# Supplementary material for: Antidepressants for the treatment of adults with major depressive disorder in the maintenance phase: a systematic review and network meta-analysis
Source: PubMed Central journal article supplement (PMC9812779; doi:10.1038/s41380-022-01824-z), 2022-10-17

## **Figure S1. Flow diagram of literature search.**

We searched PubMed, Cochrane Library, and Embase databases for studies published before May 22, 2022. The search terms for PubMed and Cochrane Library included (major depressi\*) AND (random\*) AND (double-blind) AND (reccuren\* OR relapse) AND (placebo). No language restriction was applied to the literature search. The search terms for Embase included ('major depression'/exp OR 'major depression') AND ('randomized controlled trial'/exp OR 'randomized controlled trial') AND ('placebo'/exp OR placebo) AND ('double blind procedure'/exp OR 'double blind procedure') AND ('relapse' OR 'recurrence'). In addition, reference lists of the included articles were manually searched for additional relevant published and unpublished research, including conference abstracts.

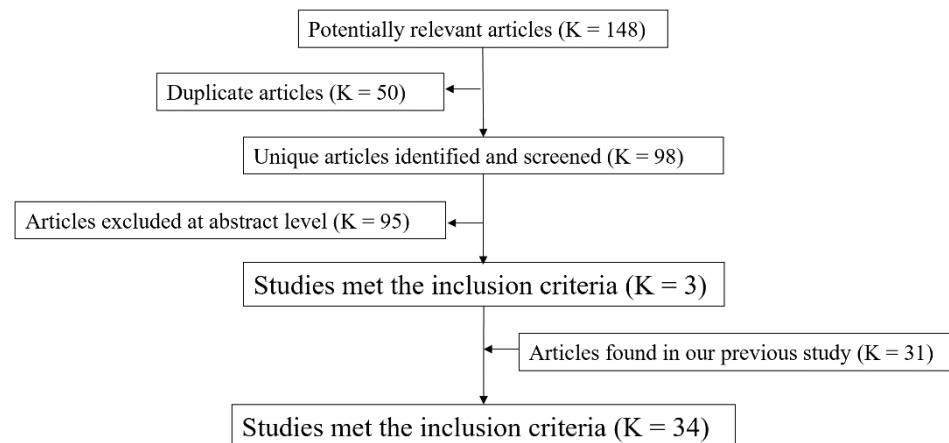

## **Articles included in the previous systematic review (K = 31)**

1. Boulenger JP, Loft H, Florea I. A randomized clinical study of Lu AA21004 in the prevention of relapse in patients with major depressive disorder. *J Psychopharmacol* 2012; 26(11): 1408-1416.
2. Dalery J, Dagens-Lafont V, De Bodinat C. Efficacy of tianeptine vs placebo in the long-term treatment (16.5 months) of unipolar major recurrent depression\*. *Hum Psychopharmacol* 2001; 16(S1): S39-S47.
3. Dekker J, Jonghe F, Tuynman H. The use of anti-depressants after recovery from depression. *Eur J Psychiatry* 2000; 14: 207-212.
4. Dobson KS, Hollon SD, Dimidjian S, Schmaling KB, Kohlenberg RJ, Gallop RJ et al. Randomized trial of behavioral activation, cognitive therapy, and antidepressant medication in the prevention of relapse and recurrence in major depression. *J Consult Clin Psychol* 2008; 76(3): 468-477.
5. Doogan DP, Caillard V. Sertraline in the prevention of depression. *Br J Psychiatry* 1992; 160: 217-222.
6. Feiger AD, Bielski RJ, Bremner J, Heiser JF, Trivedi M, Wilcox CS et al. Double-blind, placebo-substitution study of nefazodone in the prevention of relapse during continuation treatment of outpatients with major depression. *Int Clin Psychopharmacol* 1999; 14(1): 19-28.
7. Gilaberte I, Montejo AL, de la Gandara J, Perez-Sola V, Bernardo M, Massana J et al. Fluoxetine in the prevention of depressive recurrences: a double-blind study. *J Clin Psychopharmacol* 2001; 21(4): 417-424.
8. Goodwin GM, Boyer P, Emsley R, Rouillon F, de Bodinat C. Is it time to shift to better characterization of patients in trials assessing novel antidepressants? An

example of two relapse prevention studies with agomelatine. *Int Clin Psychopharmacol* 2013; 28(1): 20-28.

9. Goodwin GM, Emsley R, Rembry S, Rouillon F, Agomelatine Study G. Agomelatine prevents relapse in patients with major depressive disorder without evidence of a discontinuation syndrome: a 24-week randomized, double-blind, placebo-controlled trial. *J Clin Psychiatry* 2009; 70(8): 1128-1137.
10. Hochstrasser B, Isaksen PM, Koponen H, Lauritzen L, Mahnert FA, Rouillon F et al. Prophylactic effect of citalopram in unipolar, recurrent depression: placebo-controlled study of maintenance therapy. *Br J Psychiatry* 2001; 178: 304-310.
11. Keller MB, Kocsis JH, Thase ME, Gelenberg AJ, Rush AJ, Koran L et al. Maintenance phase efficacy of sertraline for chronic depression: a randomized controlled trial. *JAMA* 1998; 280(19): 1665-1672.
12. Kocsis JH, Thase ME, Trivedi MH, Shelton RC, Kornstein SG, Nemeroff CB et al. Prevention of recurrent episodes of depression with venlafaxine ER in a 1-year maintenance phase from the PREVENT Study. *J Clin Psychiatry* 2007; 68(7): 1014-1023.
13. McGrath PJ, Stewart JW, Quitkin FM, Chen Y, Alpert JE, Nierenberg AA et al. Predictors of relapse in a prospective study of fluoxetine treatment of major depression. *Am J Psychiatry* 2006; 163(9): 1542-1548.
14. Montgomery SA, Dunbar G. Paroxetine is better than placebo in relapse prevention and the prophylaxis of recurrent depression. *Int Clin Psychopharmacol* 1993; 8(3): 189-195.
15. Montgomery SA, Entsuah R, Hackett D, Kunz NR, Rudolph RL, Venlafaxine 335 Study G. Venlafaxine versus placebo in the preventive treatment of recurrent major depression. *J Clin Psychiatry* 2004; 65(3): 328-336.
16. Montgomery SA, Rasmussen JG, Tanghoj P. A 24-week study of 20 mg citalopram, 40 mg citalopram, and placebo in the prevention of relapse of major depression. *Int Clin Psychopharmacol* 1993; 8(3): 181-188.
17. Perahia DG, Gilaberte I, Wang F, Wiltse CG, Huckins SA, Clemens JW et al. Duloxetine in the prevention of relapse of major depressive disorder: double-blind placebo-controlled study. *Br J Psychiatry* 2006; 188: 346-353.
18. Perahia DG, Maina G, Thase ME, Spann ME, Wang F, Walker DJ et al. Duloxetine in the prevention of depressive recurrences: a randomized, double-blind, placebo-controlled trial. *J Clin Psychiatry* 2009; 70(5): 706-716.
19. Rapaport MH, Bose A, Zheng H. Escitalopram continuation treatment prevents relapse of depressive episodes. *J Clin Psychiatry* 2004; 65(1): 44-49.
20. Rickels K, Montgomery SA, Tourian KA, Guelfi JD, Pitrosky B, Padmanabhan SK et al. Desvenlafaxine for the prevention of relapse in major depressive disorder: results of a randomized trial. *J Clin Psychopharmacol* 2010; 30(1): 18-24.
21. Robert P, Montgomery SA. Citalopram in doses of 20-60 mg is effective in depression relapse prevention: a placebo-controlled 6 month study. *Int Clin Psychopharmacol* 1995; 10 Suppl 1: 29-35.

22. Rosenthal JZ, Boyer P, Vialet C, Hwang E, Tourian KA. Efficacy and safety of desvenlafaxine 50 mg/d for prevention of relapse in major depressive disorder: a randomized controlled trial. *J Clin Psychiatry* 2013; 74(2): 158-166.
23. Rouillon F, Warner B, Pezous N, Bissierbe JC. Milnacipran efficacy in the prevention of recurrent depression: a 12-month placebo-controlled study. Milnacipran recurrence prevention study group. *Int Clin Psychopharmacol* 2000; 15(3): 133-140.
24. Schmidt ME, Fava M, Robinson JM, Judge R. The efficacy and safety of a new enteric-coated formulation of fluoxetine given once weekly during the continuation treatment of major depressive disorder. *J Clin Psychiatry* 2000; 61(11): 851-857.
25. Shiovitz T, Greenberg WM, Chen C, Forero G, Gommoll CP. A Randomized, Double-blind, Placebo-controlled Trial of the Efficacy and Safety of Levomilnacipran ER 40-120mg/day for Prevention of Relapse in Patients with Major Depressive Disorder. *Innov Clin Neurosci* 2014; 11(1-2): 10-22.
26. Simon JS, Aguiar LM, Kunz NR, Lei D. Extended-release venlafaxine in relapse prevention for patients with major depressive disorder. *J Psychiatr Res* 2004; 38(3): 249-257.
27. Stein MK, Rickels K, Weise CC. Maintenance therapy with amitriptyline: a controlled trial. *Am J Psychiatry* 1980; 137(3): 370-371.
28. Terra JL, Montgomery SA. Fluvoxamine prevents recurrence of depression: results of a long-term, double-blind, placebo-controlled study. *Int Clin Psychopharmacol* 1998; 13(2): 55-62.
29. Thase ME, Nierenberg AA, Keller MB, Panagides J, Relapse Prevention Study G. Efficacy of mirtazapine for prevention of depressive relapse: a placebo-controlled double-blind trial of recently remitted high-risk patients. *J Clin Psychiatry* 2001; 62(10): 782-788.
30. Versiani M, Mehilane L, Gaszner P, Arnaud-Castiglioni R. Reboxetine, a unique selective NRI, prevents relapse and recurrence in long-term treatment of major depressive disorder. *J Clin Psychiatry* 1999; 60(6): 400-406.
31. Weihs KL, Houser TL, Batey SR, Ascher JA, Bolden-Watson C, Donahue RM et al. Continuation phase treatment with bupropion SR effectively decreases the risk for relapse of depression. *Biol Psychiatry* 2002; 51(9): 753-761.

### **Articles which we have found in the current literature search (K = 3)**

1. Durgam S, Chen C, Migliore R, Prakash C, Thase ME. Relapse prevention with levomilnacipran ER in adults with major depressive disorder: A multicenter, randomized, double-blind, placebo-controlled study. *Depress Anxiety* 2019; 36(3): 225-234.
2. Durgam S, Gommoll C, Migliore R, Chen C, Chang CT, Aguirre M et al. Relapse prevention in adults with major depressive disorder treated with vilazodone: a randomized, double-blind, placebo-controlled trial. *Int Clin Psychopharmacol* 2018; 33(6): 304-311.
3. Thase ME, Jacobsen PL, Hanson E, Xu R, Tolkoﬀ M, Murthy NV. Vortioxetine 5, 10, and 20 mg significantly reduces the risk of relapse compared with placebo in

patients with remitted major depressive disorder: The RESET study. *J Affect Disord* 2022; 303: 123-130.

### **Articles included in the previous systematic review but not in our study (K = 3)**

1. Reimherr FW, Amsterdam JD, Quitkin FM, Rosenbaum JF, Fava M, Zajecka J et al. Optimal length of continuation therapy in depression: a prospective assessment during long-term fluoxetine treatment. *Am J Psychiatry* 1998; 155(9): 1247-1253.

Reasons for exclusion: the study included individuals with MDD as well as individuals with BD2.

2. Segal ZV, Bieling P, Young T, MacQueen G, Cooke R, Martin L et al. Antidepressant monotherapy vs sequential pharmacotherapy and mindfulness-based cognitive therapy, or placebo, for relapse prophylaxis in recurrent depression. *Arch Gen Psychiatry* 2010; 67(12): 1256-1264.

Reasons for exclusion: the antidepressant treatment arm included various antidepressants.

3. Stewart JW, Tricamo E, McGrath PJ, Quitkin FM. Prophylactic efficacy of phenelzine and imipramine in chronic atypical depression: likelihood of recurrence on discontinuation after 6 months' remission. *Am J Psychiatry* 1997; 154(1): 31-36.

Reasons for exclusion: the study included individuals with MDD as well as individuals with BD2.

**Table S1. PRISMA for Network Meta-Analyses Checklist.**

| Section/Topic             | Item # | Checklist Item                                                                                                                                                                                                                                                                                                                                                                                                                                                                                                                                                                                                                                                                                                                                                                          | Reported on Page # |
|---------------------------|--------|-----------------------------------------------------------------------------------------------------------------------------------------------------------------------------------------------------------------------------------------------------------------------------------------------------------------------------------------------------------------------------------------------------------------------------------------------------------------------------------------------------------------------------------------------------------------------------------------------------------------------------------------------------------------------------------------------------------------------------------------------------------------------------------------|--------------------|
| <b>TITLE</b>              |        |                                                                                                                                                                                                                                                                                                                                                                                                                                                                                                                                                                                                                                                                                                                                                                                         |                    |
| Title                     | 1      | Identify the report as a systematic review <i>incorporating a network meta-analysis (or related form of meta-analysis)</i> .                                                                                                                                                                                                                                                                                                                                                                                                                                                                                                                                                                                                                                                            | 1                  |
| <b>ABSTRACT</b>           |        |                                                                                                                                                                                                                                                                                                                                                                                                                                                                                                                                                                                                                                                                                                                                                                                         |                    |
| Structured summary        | 2      | Provide a structured summary including, as applicable:<br><b>Background:</b> main objectives<br><b>Methods:</b> data sources; study eligibility criteria, participants, and interventions; study appraisal; and <i>synthesis methods, such as network meta-analysis</i> .<br><b>Results:</b> number of studies and participants identified; summary estimates with corresponding confidence/credible intervals; <i>treatment rankings may also be discussed. Authors may choose to summarize pairwise comparisons against a chosen treatment included in their analyses for brevity.</i><br><b>Discussion/Conclusions:</b> limitations; conclusions and implications of findings.<br><b>Other:</b> primary source of funding; systematic review registration number with registry name. | 3-                 |
| <b>INTRODUCTION</b>       |        |                                                                                                                                                                                                                                                                                                                                                                                                                                                                                                                                                                                                                                                                                                                                                                                         |                    |
| Rationale                 | 3      | Describe the rationale for the review in the context of what is already known, <i>including mention of why a network meta-analysis has been conducted.</i>                                                                                                                                                                                                                                                                                                                                                                                                                                                                                                                                                                                                                              | 5-                 |
| Objectives                | 4      | Provide an explicit statement of questions being addressed, with reference to participants, interventions, comparisons, outcomes, and study design (PICOS).                                                                                                                                                                                                                                                                                                                                                                                                                                                                                                                                                                                                                             | 5-                 |
| <b>METHODS</b>            |        |                                                                                                                                                                                                                                                                                                                                                                                                                                                                                                                                                                                                                                                                                                                                                                                         |                    |
| Protocol and registration | 5      | Indicate whether a review protocol exists and if and where it can be accessed (e.g., Web address); and, if available, provide registration information, including registration number.                                                                                                                                                                                                                                                                                                                                                                                                                                                                                                                                                                                                  | 6-                 |
| Eligibility criteria      | 6      | Specify study characteristics (e.g., PICOS, length of follow-up) and report characteristics (e.g., years considered, language, publication status) used as criteria for eligibility, giving rationale. <i>Clearly describe eligible treatments included in the</i>                                                                                                                                                                                                                                                                                                                                                                                                                                                                                                                      | 6-                 |

*treatment network, and note whether any have been clustered or merged into the same node (with justification).*\_

|                                        |           |                                                                                                                                                                                                                                                                                                                                                                                                                        |    |
|----------------------------------------|-----------|------------------------------------------------------------------------------------------------------------------------------------------------------------------------------------------------------------------------------------------------------------------------------------------------------------------------------------------------------------------------------------------------------------------------|----|
| Information sources                    | 7         | Describe all information sources (e.g., databases with dates of coverage, contact with study authors to identify additional studies) in the search and date last searched.                                                                                                                                                                                                                                             | 6- |
| Search                                 | 8         | Present full electronic search strategy for at least one database, including any limits used, such that it could be repeated.                                                                                                                                                                                                                                                                                          | 6- |
| Study selection                        | 9         | State the process for selecting studies (i.e., screening, eligibility, included in systematic review, and, if applicable, included in the meta-analysis).                                                                                                                                                                                                                                                              | 6- |
| Data collection process                | 10        | Describe method of data extraction from reports (e.g., piloted forms, independently, in duplicate) and any processes for obtaining and confirming data from investigators.                                                                                                                                                                                                                                             | 6- |
| Data items                             | 11        | List and define all variables for which data were sought (e.g., PICOS, funding sources) and any assumptions and simplifications made.                                                                                                                                                                                                                                                                                  | 6- |
| <b>Geometry of the network</b>         | <b>S1</b> | Describe methods used to explore the geometry of the treatment network under study and potential biases related to it. This should include how the evidence base has been graphically summarized for presentation, and what characteristics were compiled and used to describe the evidence base to readers.                                                                                                           | 6- |
| Risk of bias within individual studies | 12        | Describe methods used for assessing risk of bias of individual studies (including specification of whether this was done at the study or outcome level), and how this information is to be used in any data synthesis.                                                                                                                                                                                                 | 6- |
| Summary measures                       | 13        | State the principal summary measures (e.g., risk ratio, difference in means). <i>Also describe the use of additional summary measures assessed, such as treatment rankings and surface under the cumulative ranking curve (SUCRA)* values, as well as modified approaches used to present summary findings from meta-analyses.</i>                                                                                     | 6- |
| Planned methods of analysis            | 14        | Describe the methods of handling data and combining results of studies for each network meta-analysis. This should include, but not be limited to: <ul style="list-style-type: none"> <li>• <i>Handling of multi-arm trials;</i></li> <li>• <i>Selection of variance structure;</i></li> <li>• <i>Selection of prior distributions in Bayesian analyses; and</i></li> <li>• <i>Assessment of model fit.</i></li> </ul> | 6- |
| <b>Assessment of Inconsistency</b>     | <b>S2</b> | Describe the statistical methods used to evaluate the agreement of direct and indirect evidence in the treatment network(s) studied. Describe efforts taken to address its presence when found.                                                                                                                                                                                                                        | 6- |

|                                          |           |                                                                                                                                                                                                                                                                                                                                                                                                                                                   |     |
|------------------------------------------|-----------|---------------------------------------------------------------------------------------------------------------------------------------------------------------------------------------------------------------------------------------------------------------------------------------------------------------------------------------------------------------------------------------------------------------------------------------------------|-----|
| Risk of bias across studies              | 15        | Specify any assessment of risk of bias that may affect the cumulative evidence (e.g., publication bias, selective reporting within studies).                                                                                                                                                                                                                                                                                                      | 6-  |
| Additional analyses                      | 16        | Describe methods of additional analyses if done, indicating which were pre-specified. This may include, but not be limited to, the following: <ul style="list-style-type: none"> <li>• Sensitivity or subgroup analyses;</li> <li>• Meta-regression analyses;</li> <li>• <i>Alternative formulations of the treatment network; and</i></li> <li>• <i>Use of alternative prior distributions for Bayesian analyses (if applicable).</i></li> </ul> | 6-  |
| <b>RESULTS†</b>                          |           |                                                                                                                                                                                                                                                                                                                                                                                                                                                   |     |
| Study selection                          | 17        | Give numbers of studies screened, assessed for eligibility, and included in the review, with reasons for exclusions at each stage, ideally with a flow diagram.                                                                                                                                                                                                                                                                                   | 10- |
| <b>Presentation of network structure</b> | <b>S3</b> | Provide a network graph of the included studies to enable visualization of the geometry of the treatment network.                                                                                                                                                                                                                                                                                                                                 | 10- |
| <b>Summary of network geometry</b>       | <b>S4</b> | Provide a brief overview of characteristics of the treatment network. This may include commentary on the abundance of trials and randomized patients for the different interventions and pairwise comparisons in the network, gaps of evidence in the treatment network, and potential biases reflected by the network structure.                                                                                                                 | 10- |
| Study characteristics                    | 18        | For each study, present characteristics for which data were extracted (e.g., study size, PICOS, follow-up period) and provide the citations.                                                                                                                                                                                                                                                                                                      | 10- |
| Risk of bias within studies              | 19        | Present data on risk of bias of each study and, if available, any outcome level assessment.                                                                                                                                                                                                                                                                                                                                                       | 10- |
| Results of individual studies            | 20        | For all outcomes considered (benefits or harms), present, for each study: 1) simple summary data for each intervention group, and 2) effect estimates and confidence intervals. <i>Modified approaches may be needed to deal with information from larger networks.</i>                                                                                                                                                                           | 10- |
| Synthesis of results                     | 21        | Present results of each meta-analysis done, including confidence/credible intervals. <i>In larger networks, authors may focus on comparisons versus a particular comparator (e.g. placebo or standard care), with full findings presented in an</i>                                                                                                                                                                                               | 10- |

|                                      |           |                                                                                                                                                                                                                                                                                                                                                                                                                                |     |
|--------------------------------------|-----------|--------------------------------------------------------------------------------------------------------------------------------------------------------------------------------------------------------------------------------------------------------------------------------------------------------------------------------------------------------------------------------------------------------------------------------|-----|
|                                      |           | <i>appendix. League tables and forest plots may be considered to summarize pairwise comparisons. If additional summary measures were explored (such as treatment rankings), these should also be presented.</i>                                                                                                                                                                                                                |     |
| <b>Exploration for inconsistency</b> | <b>S5</b> | Describe results from investigations of inconsistency. This may include such information as measures of model fit to compare consistency and inconsistency models, <i>P</i> values from statistical tests, or summary of inconsistency estimates from different parts of the treatment network.                                                                                                                                | 10- |
| Risk of bias across studies          | 22        | Present results of any assessment of risk of bias across studies for the evidence base being studied.                                                                                                                                                                                                                                                                                                                          | 10- |
| Results of additional analyses       | 23        | Give results of additional analyses, if done (e.g., sensitivity or subgroup analyses, meta-regression analyses, <i>alternative network geometries studied, alternative choice of prior distributions for Bayesian analyses, and so forth</i> ).                                                                                                                                                                                | 10- |
| <b>DISCUSSION</b>                    |           |                                                                                                                                                                                                                                                                                                                                                                                                                                |     |
| Summary of evidence                  | 24        | Summarize the main findings, including the strength of evidence for each main outcome; consider their relevance to key groups (e.g., healthcare providers, users, and policy-makers).                                                                                                                                                                                                                                          | 13- |
| Limitations                          | 25        | Discuss limitations at study and outcome level (e.g., risk of bias), and at review level (e.g., incomplete retrieval of identified research, reporting bias). <i>Comment on the validity of the assumptions, such as transitivity and consistency. Comment on any concerns regarding network geometry (e.g., avoidance of certain comparisons).</i>                                                                            | 13- |
| Conclusions                          | 26        | Provide a general interpretation of the results in the context of other evidence, and implications for future research.                                                                                                                                                                                                                                                                                                        | 13- |
| <b>FUNDING</b>                       |           |                                                                                                                                                                                                                                                                                                                                                                                                                                |     |
| Funding                              | 27        | Describe sources of funding for the systematic review and other support (e.g., supply of data); role of funders for the systematic review. This should also include information regarding whether funding has been received from manufacturers of treatments in the network and/or whether some of the authors are content experts with professional conflicts of interest that could affect use of treatments in the network. | 16  |



**Table S2. The definition of relapse/recurrence.**

| Study name          | The definition of relapse/recurrence                                                                                                                                                                   |
|---------------------|--------------------------------------------------------------------------------------------------------------------------------------------------------------------------------------------------------|
| Stein 1980          | No detailed information                                                                                                                                                                                |
| Doogan 1992         | CGI-S $\geq 4$                                                                                                                                                                                         |
| Montgomery 1993 CIT | MADRS $\geq 22$                                                                                                                                                                                        |
| Montgomery 1993 PAR | (1) CGI-S $\geq 4$ , (2) deterioration of CGI by $\geq 2$ points, (3) met DSM-III-R criteria for MDD of 2 weeks, (4) needed antidepressant, or (5) Present of depressive symptomatology for $> 7$ days |
| Robert 1995         | (1) MADRS $\geq 25$ and (2) clinical judgment                                                                                                                                                          |
| Keller 1998         | (1) met DSM-III-R criteria for MDD during $\geq 3$ weeks, (2) CGI-S $\geq 4$ , (3) CGI-I $\geq 3$ , and (4) deterioration of HAMDD24 by $\geq 4$ points                                                |
| Terra 1998          | (1) met DSM-III-R criteria for MDD or (2) suicide attempt or completed suicide                                                                                                                         |
| Feiger 1999         | (1) HAMDD17 $\geq 18$ for 2 consecutive visits or (2) lack of efficacy                                                                                                                                 |
| Versiani 1999       | (1) HAMDD21 $\geq 18$ or (2) deterioration of HAMDD scores by $\geq 50\%$                                                                                                                              |
| Dekker 2000         | HAMDD17 $\geq 14$                                                                                                                                                                                      |
| Rouillon 2000       | (1) met DSM-III-R criteria for MDE and (2) HAMDD21 $\geq 18$ with the need to treat the recurrence                                                                                                     |
| Schmidt 2000        | (1) met SCID-P criteria for MDE and (2) deterioration of CGI-S by $\geq 2$ points                                                                                                                      |
| Dalery 2001         | (1) HAMDD17 $\geq 15$ and/or CGI $\geq 4$ or (2) clinical judgement                                                                                                                                    |
| Gilaberte 2001      | (1) met DSM-III-R criteria for MDD, (2) HAMDD17 $\geq 18$ , or (3) CGI $\geq 4$                                                                                                                        |
| Hochstrasser 2001   | MADRS $\geq 22$                                                                                                                                                                                        |
| Thase 2001          | Clinical judgment                                                                                                                                                                                      |
| Weihs 2002          | The need for treatment intervention                                                                                                                                                                    |
| Montgomery 2004     | CGI-S $\geq 4$                                                                                                                                                                                         |
| Rapaport 2004       | (1) MADRS $\geq 22$ or (2) withdrawal due to lack of efficacy                                                                                                                                          |
| Simon 2004          | (1) met DSM-IV criteria for MDD and (2) CGI-S $\geq 4$ for 2 consecutive visits or final CGI-S $\geq 4$                                                                                                |
| Perahia 2006        | (1) deterioration of CGI-S by $\geq 2$ points, (2) met MINI criteria for MDD for 2 consecutive visits                                                                                                  |
| McGrath 2006        | CGI-I $\geq 3$ for 2 consecutive weeks                                                                                                                                                                 |

|                |                                                                                                                                                                                                        |
|----------------|--------------------------------------------------------------------------------------------------------------------------------------------------------------------------------------------------------|
| Kocsis 2007    | (1) HAMD17 > 12 with a reduction of HAMD17 scores from acute phase by $\leq 50\%$ for 2 consecutive visits, (2) withdrawal, and (3) met DSM-IV criteria for MDD                                        |
| Dobson 2008    | (1) HAMD17 $\geq 14$ for 2 successive weeks, or (2) Psychiatric status rating $\geq 5$ for 2 successive weeks                                                                                          |
| Goodwin 2009   | (1) HAMD17 $\geq 16$ , (2) withdrawal due to lack of efficacy, or (3) suicide attempt or completed suicide                                                                                             |
| Perahia 2009   | (1) CGI-S $\geq 4$ and met DSM-IV criteria for MDD for $\geq 2$ weeks, (2) met re-emergence criteria for 3 consecutive visits or 10 re-emergence visits, or (3) withdrawal due to lack of efficacy     |
| Rickels 2010   | (1) HAMD17 $\geq 16$ or CGI-I $\geq 6$ , or (2) withdrawal due to lack of efficacy                                                                                                                     |
| Boulenger 2012 | (1) MADRS $\geq 22$ , or (2) clinical judgment                                                                                                                                                         |
| Goodwin 2013   | (1) HAMD17 $\geq 16$ , (2) withdrawal due to lack of efficacy, or (3) suicide attempt or completed suicide                                                                                             |
| Rosenthal 2013 | (1) HAMD17 $\geq 16$ , (2) withdrawal due to lack of efficacy, (3) hospitalization for depression, or (4) suicide attempt or completed suicide                                                         |
| Shiovitz 2014  | (1) MADRS $\geq 22$ for 2 consecutive visits, (2) deterioration of CGI-I by $\geq 2$ points for 2 consecutive visits, (3) withdrawal due to lack of efficacy, or (4) MADRS (item 10) $\geq 4$          |
| Durgam 2018    | (1) MADRS $\geq 18$ for 2 consecutive visits, (2) discontinuation due to lack of efficacy (needed medication switch and deterioration of CGI-S by $\geq 2$ points), (3) hospitalization for depression |
| Durgam 2019    | (1) deterioration of CGI-S by $\geq 2$ points, (2) risk of suicide, (3) hospitalization for depression, (4) needed medication switch, (5) MADRS $\geq 18$ for 2 consecutive visits                     |
| Thase 2022     | 1) MADRS $\geq 22$ , (2) lack of efficacy, (3) unsatisfactory treatment response                                                                                                                       |

CGI: Clinical Global Impressions, CGI-I: Clinical Global Impression–Global Improvement, CGI-S: Clinical Global Impressions–severity of illness, DSM(R or TR): Diagnostic and Statistical Manual of Mental Disorders(Revision or Text Revision), HAMD: Hamilton Rating Scale for Depression, MADRS: Montgomery Åsberg Depression Rating Scale

**Table S3. Data synthesis of 6-month relapse/recurrence.**

| Study name          | 6-month relapse rate |
|---------------------|----------------------|
| Stein 1980          | Data at 26 weeks     |
| Doogan 1992         | Data at 26 weeks     |
| Montgomery 1993 CIT | Data at 24 weeks     |
| Montgomery 1993 PAR | Data at 26 weeks     |
| Robert 1995         | Data at 24 weeks     |
| Keller 1998         | Data at 26 weeks     |
| Terra 1998          | Data at 26 weeks     |
| Feiger 1999         | Data at 26 weeks     |
| Versiani 1999       | Data at 26 weeks     |
| Dekker 2000         | Data at 22 weeks     |
| Rouillon 2000       | Data at 26 weeks     |
| Schmidt 2000        | Data at 25 weeks     |
| Dalery 2001         | Data at 26 weeks     |
| Gilaberte 2001      | Data at 26 weeks     |
| Hochstrasser 2001   | Data at 26 weeks     |
| Thase 2001          | Data at 26 weeks     |
| Weihs 2002          | Data at 26 weeks     |
| Montgomery 2004     | Data at 26 weeks     |
| Rapaport 2004       | Data at 26 weeks     |
| Simon 2004          | Data at 26 weeks     |
| Perahia 2006        | Data at 26 weeks     |
| McGrath 2006        | Data at 26 weeks     |
| Kocsis 2007         | Data at 26 weeks     |

|                |                  |
|----------------|------------------|
| Dobson 2008    | Data at 26 weeks |
| Goodwin 2009   | Data at 24 weeks |
| Perahia 2009   | Data at 26 weeks |
| Rickels 2010   | Data at 26 weeks |
| Boulenger 2012 | Data at 26 weeks |
| Goodwin 2013   | Data at 26 weeks |
| Rosenthal 2013 | Data at 26 weeks |
| Shiovitz 2014  | Data at 24 weeks |
| Durgam 2018    | Data at 26 weeks |
| Durgam 2019    | Data at 26 weeks |
| Thase 2022     | Data at 26 weeks |

**Table S4. Study characteristics.**

| Study name       | Region        | AD    | Sponsor  | PT status | Diagnosis | Total n | Mean age±SD | Female (%) | Number of episodes | Duration of preliminary phase (w) | Duration of RCT phase (w) | Mean score at baseline of acute study | AD dose      | Mean final dose (mg/d) | Dosing schedule | Discontinuation method |
|------------------|---------------|-------|----------|-----------|-----------|---------|-------------|------------|--------------------|-----------------------------------|---------------------------|---------------------------------------|--------------|------------------------|-----------------|------------------------|
| Stein 1980       | USA           | AMI   | Academia | OP        | DSM3      | 55      | 42.3±12.8   | 65         | NI                 | 8                                 | 26                        | HAMD: 25.1**                          | 100-150      | NI                     | Flexible        | AB                     |
| Doogan 1992      | International | SER   | Industry | OP        | DSM3      | 300     | 51          | 69         | NI                 | 8                                 | 44                        | HAMD17: ≥ 17                          | 50-200       | 69.3-82.1              | Flexible        | AB                     |
| Montgomery 1993a | UK            | PAR   | Industry | NI        | DSM3R     | 135     | 47.09±8.76  | 78.52      | NI                 | 8                                 | 52                        | HAMD21: 26.9                          | 20-30        | NI                     | Flexible        | NI                     |
| Montgomery 1993b | International | CIT   | Industry | Both      | DSM3R     | 147     | NI          | NI         | NI                 | 6                                 | 24                        | MADRS: ≥ 22                           | 20 or 40     | 30.86                  | Fixed           | NI                     |
| Robert 1995      | France        | CIT   | Industry | NI        | DSM3R     | 226     | NI          | 71.68      | NI                 | 8                                 | 24                        | MADRS: ≥ 25                           | 20, 40 or 60 | NI                     | Fixed           | NI                     |
| Keller 1998      | USA           | SER   | Industry | OP        | DSM3R     | 161     | 41.63±9.38  | 65.84      | 1.85               | 28                                | 76                        | HAMD24: 24.9                          | 50-200       | 146.1                  | Flexible        | TAP                    |
| Terra 1998       | France        | FLUV  | Industry | NI        | DSM3R     | 204     | 44.73±11.00 | 73.53      | 3.5                | 24                                | 52                        | MADRS: ≥ 24                           | 100          | 100                    | Fixed           | NI                     |
| Feiger 1999      | USA           | NEF   | Industry | OP        | DSM3R     | 131     | 41.31±10.98 | 71.76      | 1.60               | 16                                | 36                        | HAMD: 24.3                            | 100-600      | 412                    | Flexible        | NI                     |
| Versiani 1999    | International | REB   | Industry | Both      | DSM3R     | 286     | 42.86±11.89 | 73.43      | NI                 | 6                                 | 46                        | HAMD21: 29.6                          | 4-8          | NI                     | Flexible        | NI                     |
| Dekker 2000      | Netherland    | FLUO  | Industry | OP        | DSM3R     | 30      | 37±10       | 61.9       | NI                 | 16                                | 22                        | HAMD17: ≥ 14                          | 20           | 20                     | Fixed           | NI                     |
| Rouillon 2000    | France        | MIL   | Industry | Both      | DSM3R     | 214     | 45.33±10.1  | 67.28      | 2.98               | 26                                | 52                        | HAMD21: 25.1                          | 100          | 100                    | Fixed           | NI                     |
| Schmidt 2000     | USA           | FLUO* | Industry | OP        | DSM4      | 501     | 41.47±11.34 | 68.26      | NI                 | 13                                | 25                        | HAMD17: ≥ 18                          | 20           | 20                     | Fixed           | AB                     |
| Dalery 2001      | France        | TIA   | Industry | Both      | DSM3R     | 185     | 43.31±      | 65.41      | 2.56               | 6                                 | 79                        | HAMD17: 23.3                          | 37.5         | 37.5                   | Fixed           | NI                     |

|                   |               |      |          |      |        |     |             |       |      |         |         |                  |                |            |          |     |
|-------------------|---------------|------|----------|------|--------|-----|-------------|-------|------|---------|---------|------------------|----------------|------------|----------|-----|
| Gilaberte 2001    | Spain         | FLUO | Industry | OP   | DSM3R  | 140 | 44.1        | 78.6  | 2.45 | 32      | 52      | HAMD17: 24       | 20             | 20         | Fixed    | NI  |
| Hochstrasser 2001 | International | CIT  | Industry | Both | DSM4   | 269 | 43.1±10.64  | 71.2  | 3.5  | 22-25   | 48-78 w | MADRS: 30.5      | 20, 40 or 60   | 33.94      | Fixed    | NI  |
| Thase 2001        | USA           | MIR  | Industry | NI   | DSM4   | 161 | 40.41±11.61 | 50.64 | NI   | 8-12    | 40      | HAMD17: 22.7     | 30-45          | 38.6       | Flexible | AB  |
| Weihls 2002       | USA           | BUP  | Industry | NI   | DSM4   | 423 | 39.65±0.25  | 65.01 | 3.00 | 8       | 44      | HAMD21: ≥ 18     | 300            | 290        | Fixed    | NI  |
| Montgomery 2004   | International | VEN  | Industry | OP   | DSM3R  | 235 | 43.65±11.08 | 68.89 | 3.21 | 26      | 52      | HAMD21: 25.2     | 100~200        | 132-152*** | Flexible | TAP |
| Rapaport 2004     | USA           | ESC  | Industry | OP   | DSM4   | 274 | 42.53±11.69 | 60.95 | NI   | 8       | 36      | MADRS: ≥22       | 10 or 20       | NI         | Fixed    | NI  |
| Simon 2004        | NA            | VEN  | Industry | NI   | DSM4   | 318 | 42.05       | 64.38 | NI   | 8       | 26      | HAMD21: 24.5     | 75, 150 or 225 | 177-191    | Fixed    | TAP |
| Perahia 2006      | International | DUL  | Industry | NI   | DSM4   | 278 | 45.24±12.25 | 72.66 | NI   | 12      | 26      | HAMD17: 23.7     | 60             | 60         | Fixed    | TAP |
| McGrath 2006      | USA           | FLUO | Academia | NI   | DSM4   | 262 | 38.2±10.9   | 55.3  | NI   | 12      | 52      | HAMD17: 17.7**** | 40 or 60       | 45.8       | Fixed    | NI  |
| Kocsis 2007       | USA           | VEN  | Industry | OP   | DSM4   | 267 | 42.3        | 68    | NI   | 36      | 52      | HAMD17: 22.4     | 75-300         | 220.8      | Flexible | TAP |
| Dobson 2008       | USA           | PAR  | Academia | OP   | DSM4   | 49  | 38.93±10.04 | 78.2  | 1.12 | 16      | 52      | HAMD17: 20.9     | 10-50          | NI         | Flexible | TAP |
| Goodwin 2009      | International | AGO  | Industry | OP   | DSM4TR | 339 | 43.25±10.58 | 74.31 | 3.6  | 8 or 10 | 24      | HAMD17: 27.0     | 25 or 50       | NI         | Fixed    | AB  |
| Perahia 2009      | International | DUL  | Industry | OP   | DSM4   | 288 | 47.54±12.54 | 71.53 | 4.2  | 34      | 52      | HAMD17: 23.1     | 60-120         | 84.3       | Fixed    | TAP |
| Rickels 2010      | International | DES  | Industry | OP   | DSM4   | 375 | 42.75±12.04 | 67.47 | NI   | 12      | 26      | HAMD17: 24.2     | 200-400        | NI         | Fixed    | TAP |

|                   |                   |      |          |      |        |     |             |       |      |    |       |              |                  |       |       |     |
|-------------------|-------------------|------|----------|------|--------|-----|-------------|-------|------|----|-------|--------------|------------------|-------|-------|-----|
| Boulenger<br>2012 | International     | VOR  | Industry | Both | DSM4TR | 400 | 44.95±12.24 | 63.13 | 2.1  | 12 | 24-64 | MADRS: 32.3  | 5 or 10          | 8.53  | Fixed | AB  |
| Goodwin<br>2013   | International     | AGO  | Industry | OP   | DSM4TR | 367 | 45.64±10.3  | 77.92 | 4.4  | 8  | 42    | HAMD17: 26.3 | 25               | 25    | Fixed | NI  |
| Rosenthal<br>2013 | International     | DESV | Industry | OP   | DSM4   | 548 | 45.95 ±13   | 71.35 | 2.12 | 20 | 26    | HAMD17: 24.2 | 50               | 50    | Fixed | TAP |
| Shiovitz 2014     | USA and<br>Canada | LEV  | Industry | OP   | DSM4TR | 348 | 43.28±12.25 | 57.97 | 4.77 | 12 | 24    | MADRS: 30.7  | 40, 80 or<br>120 | 79    | Fixed | TAP |
| Durgam 2018       | International     | VIL  | Industry | OP   | DSM4TR | 564 | 45.25±12.21 | 63.06 | 4.60 | 20 | 28    | MADRS: 31.7  | 20 or 40         | 30.05 | Fixed | TAP |
| Durgam 2019       | USA               | LEV  | Industry | OP   | DSM5   | 324 | 45.39±13.46 | 67.28 | 5.2  | 20 | 26    | MADRS: 32.2  | 40-120           | NI    | Fixed | TAP |
| Thase 2022        | USA               | VOR  | Industry | OP   | DSM4TR | 580 | 45.1±13.23  | 72.42 | NI   | 16 | 28    | MADRS: 33.9  | 5, 10 or<br>20   | 11.72 | Fixed | AB  |

AB: abrupt discontinuation, AD: antidepressant, AGO: agomelatine, AMI: amitriptyline, Both: both outpatient and inpatient, BUP: bupropion, CGI-S: Clinical Global Impressions - severity of illness, CIT: citalopram, d: day, DES: desvenlafaxine, DSM(R or TR): Diagnostic and Statistical Manual of Mental Disorders(Revision or Text Revision), DUL: duloxetine, ESC: escitalopram, FLUO: fluoxetine, FLUV: fluvoxamine, HAMD: Hamilton Rating Scale for Depression, LEV: levomilnacipran, MADRS: Montgomery Åsberg Depression Rating Scale, MIL: milnacipran, MIR: mirtazapine, n: number of patients, NEF: nefazodone, NI: not information, OP: outpatient, PAR: paroxetine, PT: patient, RCT: randomized controlled trial, REB: reboxetine, SD: standard deviation, SER: sertraline, TAP: tapering discontinuation, TIA: tianeptine, UK: United Kingdom, USA: United States of America, VEN: venlafaxine, VIL: vilazodone, VOR: vortioxetine, w: week

\* daily or once weekly

\*\* This study did not report the detailed information that participants in acute study had a requirement of a scale-derived minimum of symptoms at baseline.

\*\*\* The dose was the mean dose during the study.

\*\*\*\* This study reported that participants in acute study did not have a requirement of a scale-derived minimum of symptoms at baseline.

**Table S5. Transitivity assessment.**

|                                      | Boxplot | Kruskal–Wallis equality of populations rank test for continuous variables or the Pearson chi-squared test for binary and categorical variables (or the Fisher exact test whether more than 20% of cells had an expected frequency below 5) |
|--------------------------------------|---------|--------------------------------------------------------------------------------------------------------------------------------------------------------------------------------------------------------------------------------------------|
| Mean age (K = 32)                    |         | Chi-squared with ties = 22.06 (df = 19), p = 0.2812                                                                                                                                                                                        |
| Proportion of females (K = 33)       |         | Chi-squared with ties = 17.19 (df = 19), p = 0.5767                                                                                                                                                                                        |
| Number of episodes (K = 18)          |         | Chi-squared with ties = 16.91 (df = 15), p = 0.3241                                                                                                                                                                                        |
| Total number of participants (K= 34) |         | Chi-squared with ties = 25.55 (df = 19), p = 0.1431                                                                                                                                                                                        |



|                                       |  |                                                       |
|---------------------------------------|--|-------------------------------------------------------|
| Patient status (K= 26)                |  | Fisher $\chi^2 = 22.18$ , $p = 0.1089$                |
| Publication year (K= 34)              |  | Chi-squared with ties = 28.80 (df = 19), $p = 0.0692$ |
| Sponsorship (K= 34)                   |  | Fisher $\chi^2 = 18.462$ , $p = 0.4918$               |
| Duration of preliminary phase (K= 34) |  | Chi-squared with ties = 17.41 (df = 19), $p = 0.5624$ |
| Country (K =33)                       |  | Fisher $\chi^2 = 17.88$ , $p = 0.5308$                |

|                                        |  |                                                                         |
|----------------------------------------|--|-------------------------------------------------------------------------|
| <p>Risk of bias (K= 34)</p>            |  | <p>Fisher <math>\chi^2 = 34.00</math>, <math>p = 0.0184</math></p>      |
| <p>Discontinuation method (K = 19)</p> |  | <p>Fisher <math>\chi^2 = 16.85</math>, <math>p = 0.1124</math></p>      |
| <p>Dosage schedule (K= 34)</p>         |  | <p>Fisher <math>\chi^2 = 0.0426</math>, <math>p = 0.0726</math></p>     |
| <p>Antidepressant dose (K= 31)</p>     |  | <p>Chi-squared with ties = 19.81 (df = 17), <math>p = 0.2839</math></p> |

**Table S6. Risk of bias summary.**

|                      | Randomization process | Deviation from intended intervention | Missing outcome data | Measurement of the outcome | Selection of the reported result | Overall risk of bias |
|----------------------|-----------------------|--------------------------------------|----------------------|----------------------------|----------------------------------|----------------------|
| Stein 1980           | Some concerns         | Some concerns                        | Low                  | Some concerns              | Low                              | Some concerns        |
| Doogan 1992          | Some concerns         | Low                                  | Low                  | Some concerns              | Low                              | Some concerns        |
| Montgomery 1993a PAR | Some concerns         | Some concerns                        | Low                  | Some concerns              | Low                              | Some concerns        |
| Montgomery 1993b CIT | Some concerns         | Some concerns                        | Low                  | Some concerns              | Low                              | Some concerns        |
| Robert 1995          | Some concerns         | Some concerns                        | Low                  | Some concerns              | Low                              | Some concerns        |
| Keller 1998          | Some concerns         | Low                                  | Low                  | Low                        | Low                              | Some concerns        |
| Terra 1998           | Some concerns         | Some concerns                        | Low                  | Some concerns              | Low                              | Some concerns        |
| Feiger 1999          | Some concerns         | Low                                  | Low                  | Some concerns              | Low                              | Some concerns        |
| Versiani 1999        | Some concerns         | Some concerns                        | Low                  | Some concerns              | Low                              | Some concerns        |
| Dekker 2000          | Some concerns*        | Low                                  | Low                  | Low                        | Low                              | Some concerns        |
| Rouillon 2000        | Some concerns         | Some concerns                        | Low                  | Some concerns              | Low                              | Some concerns        |
| Schmidt 2000         | Some concerns         | Some concerns                        | Low                  | Some concerns              | Low                              | Some concerns        |
| Dalery 2001          | Some concerns         | Low                                  | Low                  | Some concerns              | Low                              | Some concerns        |
| Gilaberte 2001       | Some concerns         | Some concerns                        | Low                  | Some concerns              | Low                              | Some concerns        |
| Hochstrasser 2001    | Some concerns         | Some concerns                        | Low                  | Some concerns              | Low                              | Some concerns        |
| Thase 2001           | Some concerns         | Low                                  | Low                  | Some concerns              | Low                              | Some concerns        |
| Weihs 2002           | Some concerns         | Low                                  | Low                  | Some concerns              | Low                              | Some concerns        |
| Montgomery 2004      | Some concerns         | Some concerns                        | Low                  | Some concerns              | Low                              | Some concerns        |
| Rapaport 2004        | Some concerns         | Some concerns                        | Low                  | Some concerns              | Low                              | Some concerns        |
| Simon 2004           | Some concerns         | Some concerns                        | Low                  | Some concerns              | Low                              | Some concerns        |
| Perahia 2006         | Some concerns         | Some concerns                        | Low                  | Some concerns              | Low                              | Some concerns        |
| McGrath 2006         | Some concerns*        | Low                                  | Low                  | Low                        | Low                              | Some concerns        |

|                |                |               |     |               |     |               |
|----------------|----------------|---------------|-----|---------------|-----|---------------|
| Kocsis 2007    | Some concerns  | Low           | Low | Low           | Low | Some concerns |
| Dobson 2008    | Some concerns* | Some concerns | Low | Some concerns | Low | Some concerns |
| Goodwin 2009   | Some concerns* | Low           | Low | Low           | Low | Some concerns |
| Perahia 2009   | Some concerns  | Some concerns | Low | Some concerns | Low | Some concerns |
| Rickels 2010   | Some concerns  | Some concerns | Low | Some concerns | Low | Some concerns |
| Boulenger 2012 | Low            | Low           | Low | Low           | Low | Low           |
| Goodwin 2013   | Some concerns* | Low           | Low | Low           | Low | Some concerns |
| Rosenthal 2013 | Some concerns* | Some concerns | Low | Some concerns | Low | Some concerns |
| Shiovitz 2014  | Low            | Low           | Low | Low           | Low | Low           |
| Durgam 2018    | Low            | Low           | Low | Low           | Low | Low           |
| Durgam 2019    | Low            | Low           | Low | Low           | Low | Low           |
| Thase 2022     | Low            | Low           | Low | Low           | Low | Low           |

\* We did not find the sufficient information to assess the risk of bias with respect to “allocation concealment.”

“Some concerns” in each domain: because we did not find the sufficient information to assess the risk of bias with respect to the domains.

Risk of bias in RCTs for the main outcomes was assessed independently using the Cochrane risk-of-bias tool for randomized trials (RoB 2).<sup>2</sup>

<https://www.riskofbias.info/welcome>

**Appendix S1. 6-month relapse rate. (K = 34, n = 9189).**

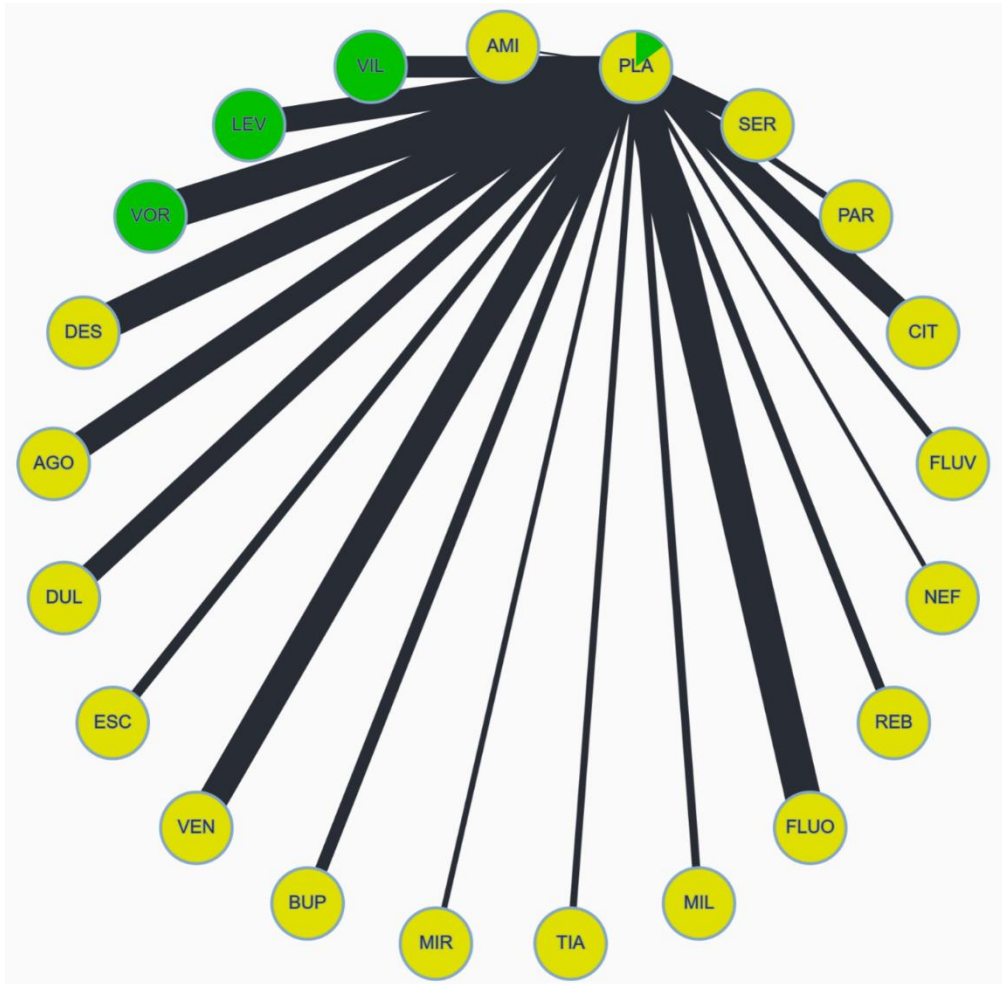

Node color by risk of bias

Green: low overall risk of bias

Yellow: moderate overall risk of bias

Edge width by sample size

**League table (risk ratio with 95% credible interval)**

|                             |                      |                      |                      |                      |                      |                      |                      |                      |                      |                      |     |  |  |  |  |  |  |  |  |  |
|-----------------------------|----------------------|----------------------|----------------------|----------------------|----------------------|----------------------|----------------------|----------------------|----------------------|----------------------|-----|--|--|--|--|--|--|--|--|--|
| PLA                         |                      |                      |                      |                      |                      |                      |                      |                      |                      |                      |     |  |  |  |  |  |  |  |  |  |
| 0.693 (0.449, 1.084)        | AGO                  |                      |                      |                      |                      |                      |                      |                      |                      |                      |     |  |  |  |  |  |  |  |  |  |
| <b>0.393 (0.161, 0.852)</b> | 0.563 (0.212, 1.360) | AMI                  |                      |                      |                      |                      |                      |                      |                      |                      |     |  |  |  |  |  |  |  |  |  |
| 0.728 (0.418, 1.288)        | 1.051 (0.515, 2.096) | 1.862 (0.713, 5.373) | BUP                  |                      |                      |                      |                      |                      |                      |                      |     |  |  |  |  |  |  |  |  |  |
| <b>0.396 (0.260, 0.598)</b> | 0.572 (0.309, 1.044) | 1.013 (0.417, 2.686) | 0.544 (0.270, 1.087) | CIT                  |                      |                      |                      |                      |                      |                      |     |  |  |  |  |  |  |  |  |  |
| <b>0.527 (0.347, 0.787)</b> | 0.763 (0.412, 1.414) | 1.354 (0.559, 3.548) | 0.723 (0.357, 1.432) | 1.328 (0.729, 2.430) | DES                  |                      |                      |                      |                      |                      |     |  |  |  |  |  |  |  |  |  |
| <b>0.447 (0.273, 0.719)</b> | 0.643 (0.326, 1.224) | 1.143 (0.440, 3.072) | 0.613 (0.288, 1.270) | 1.124 (0.586, 2.122) | 0.844 (0.438, 1.577) | DUL                  |                      |                      |                      |                      |     |  |  |  |  |  |  |  |  |  |
| 0.605 (0.326, 1.142)        | 0.878 (0.407, 1.875) | 1.539 (0.575, 4.582) | 0.832 (0.356, 1.939) | 1.533 (0.731, 3.263) | 1.148 (0.547, 2.469) | 1.354 (0.616, 3.062) | ESC                  |                      |                      |                      |     |  |  |  |  |  |  |  |  |  |
| <b>0.583 (0.410, 0.789)</b> | 0.843 (0.470, 1.393) | 1.484 (0.612, 3.831) | 0.800 (0.408, 1.483) | 1.471 (0.855, 2.480) | 1.113 (0.644, 1.820) | 1.309 (0.716, 2.299) | 0.963 (0.462, 1.900) | FLUO                 |                      |                      |     |  |  |  |  |  |  |  |  |  |
| <b>0.298 (0.114, 0.686)</b> | 0.426 (0.150, 1.113) | 0.763 (0.225, 2.566) | 0.409 (0.132, 1.097) | 0.748 (0.266, 1.908) | 0.564 (0.197, 1.428) | 0.667 (0.229, 1.744) | 0.491 (0.155, 1.399) | 0.513 (0.190, 1.256) | FLUV                 |                      |     |  |  |  |  |  |  |  |  |  |
| 0.560 (0.305, 1.020)        | 0.919 (0.481, 1.739) | 1.630 (0.628, 4.463) | 0.872 (0.423, 1.795) | 1.613 (0.852, 3.018) | 1.210 (0.658, 2.270) | 1.429 (0.730, 2.870) | 1.051 (0.476, 2.261) | 1.096 (0.627, 1.984) | 2.129 (0.826, 6.283) | LEV                  |     |  |  |  |  |  |  |  |  |  |
| 0.719 (0.331, 1.545)        | 1.029 (0.427, 2.630) | 1.856 (0.615, 5.939) | 0.988 (0.373, 2.456) | 1.806 (0.758, 4.475) | 1.371 (0.566, 3.240) | 1.618 (0.638, 4.081) | 1.191 (0.434, 3.212) | 1.234 (0.539, 2.863) | 2.424 (0.760, 8.416) | 1.127 (0.467, 2.756) | MIL |  |  |  |  |  |  |  |  |  |

|                                       |                                       |                         |                                       |                                       |                                       |                                       |                                       |                                       |                                        |                                       |                                       |                         |                                        |                                       |                                       |                                        |                                        |                         |                         |     |  |  |
|---------------------------------------|---------------------------------------|-------------------------|---------------------------------------|---------------------------------------|---------------------------------------|---------------------------------------|---------------------------------------|---------------------------------------|----------------------------------------|---------------------------------------|---------------------------------------|-------------------------|----------------------------------------|---------------------------------------|---------------------------------------|----------------------------------------|----------------------------------------|-------------------------|-------------------------|-----|--|--|
| <b>0.402 (0.190,</b><br><b>0.829)</b> | 0.581 (0.246,<br>1.315)               | 1.029 (0.346,<br>3.263) | 0.554 (0.217,<br>1.374)               | 1.014 (0.430,<br>2.334)               | 0.760 (0.329,<br>1.762)               | 0.910 (0.378,<br>2.190)               | 0.665 (0.254,<br>1.718)               | 0.691 (0.306,<br>1.562)               | 1.347 (0.435,<br>4.527)                | 0.631 (0.268,<br>1.485)               | 0.554 (0.196,<br>1.648)               | MIR                     |                                        |                                       |                                       |                                        |                                        |                         |                         |     |  |  |
| <b>0.149 (0.018,</b><br><b>0.610)</b> | <b>0.215 (0.025,</b><br><b>0.955)</b> | 0.378 (0.041,<br>1.963) | <b>0.205 (0.024,</b><br><b>0.920)</b> | 0.376 (0.045,<br>1.644)               | 0.281 (0.033,<br>1.225)               | 0.337 (0.039,<br>1.508)               | 0.246 (0.029,<br>1.148)               | 0.257 (0.032,<br>1.107)               | 0.503 (0.054,<br>2.681)                | 0.234 (0.027,<br>1.017)               | 0.203 (0.022,<br>1.064)               | 0.373 (0.041,<br>1.791) | NEF                                    |                                       |                                       |                                        |                                        |                         |                         |     |  |  |
| <b>0.416 (0.220,</b><br><b>0.759)</b> | 0.601 (0.279,<br>1.250)               | 1.056 (0.396,<br>3.086) | 0.568 (0.241,<br>1.290)               | 1.052 (0.499,<br>2.164)               | 0.789 (0.372,<br>1.625)               | 0.936 (0.424,<br>2.020)               | 0.681 (0.285,<br>1.645)               | 0.715 (0.353,<br>1.445)               | 1.401 (0.490,<br>4.344)                | 0.651 (0.302,<br>1.381)               | 0.576 (0.210,<br>1.553)               | 1.029 (0.388,<br>2.711) | 2.777 (0.592,<br>24.878)               | PAR                                   |                                       |                                        |                                        |                         |                         |     |  |  |
| <b>0.520 (0.278,</b><br><b>0.968)</b> | 0.754 (0.344,<br>1.578)               | 1.338 (0.488,<br>3.868) | 0.715 (0.306,<br>1.655)               | 1.318 (0.614,<br>2.804)               | 0.988 (0.467,<br>2.099)               | 1.164 (0.521,<br>2.636)               | 0.859 (0.353,<br>2.070)               | 0.896 (0.455,<br>1.857)               | 1.752 (0.622,<br>5.553)                | 0.815 (0.378,<br>1.790)               | 0.727 (0.267,<br>1.995)               | 1.285 (0.493,<br>3.403) | 3.483 (0.731,<br>30.248)               | 1.251 (0.526,<br>2.991)               | REB                                   |                                        |                                        |                         |                         |     |  |  |
| <b>0.165 (0.083,</b><br><b>0.305)</b> | <b>0.237 (0.107,</b><br><b>0.502)</b> | 0.415 (0.151,<br>1.267) | <b>0.225 (0.094,</b><br><b>0.529)</b> | <b>0.416 (0.186,</b><br><b>0.890)</b> | <b>0.310 (0.142,</b><br><b>0.670)</b> | <b>0.368 (0.163,</b><br><b>0.838)</b> | <b>0.271 (0.108,</b><br><b>0.673)</b> | <b>0.282 (0.134,</b><br><b>0.587)</b> | 0.553 (0.188,<br>1.781)                | <b>0.258 (0.112,</b><br><b>0.566)</b> | <b>0.228 (0.082,</b><br><b>0.632)</b> | 0.407 (0.154,<br>1.067) | 1.098 (0.227,<br>9.845)                | <b>0.397 (0.161,</b><br><b>0.973)</b> | <b>0.317 (0.127,</b><br><b>0.773)</b> | SER                                    |                                        |                         |                         |     |  |  |
| <b>0.258 (0.084,</b><br><b>0.698)</b> | 0.372 (0.111,<br>1.080)               | 0.668 (0.170,<br>2.502) | 0.357 (0.103,<br>1.063)               | 0.653 (0.194,<br>1.923)               | 0.494 (0.148,<br>1.451)               | 0.580 (0.172,<br>1.761)               | 0.425 (0.116,<br>1.370)               | 0.446 (0.140,<br>1.283)               | 0.868 (0.221,<br>3.473)                | 0.407 (0.120,<br>1.212)               | 0.359 (0.091,<br>1.247)               | 0.647 (0.174,<br>2.188) | 1.748 (0.283,<br>17.388)               | 0.625 (0.174,<br>2.068)               | 0.499 (0.139,<br>1.626)               | 1.564 (0.440,<br>5.219)                | TIA                                    |                         |                         |     |  |  |
| <b>0.555 (0.386,</b><br><b>0.784)</b> | 0.800 (0.457,<br>1.374)               | 1.425 (0.592,<br>3.565) | 0.758 (0.386,<br>1.488)               | 1.405 (0.808,<br>2.374)               | 1.055 (0.599,<br>1.795)               | 1.242 (0.690,<br>2.291)               | 0.917 (0.437,<br>1.865)               | 0.951 (0.594,<br>1.563)               | 1.854 (0.749,<br>5.084)                | 0.869 (0.476,<br>1.569)               | 0.774 (0.328,<br>1.804)               | 1.383 (0.620,<br>3.131) | 3.762 (0.859,<br>32.110)               | 1.330 (0.665,<br>2.818)               | 1.063 (0.514,<br>2.162)               | <b>3.381 (1.625,</b><br><b>7.259)</b>  | 2.134 (0.739,<br>6.943)                | VEN                     |                         |     |  |  |
| 0.990 (0.512,<br>1.934)               | 1.430 (0.650,<br>3.122)               | 2.518 (0.927,<br>7.507) | 1.358 (0.569,<br>3.207)               | <b>2.485 (1.136,</b><br><b>5.494)</b> | 1.874 (0.850,<br>4.201)               | 2.218 (0.984,<br>5.124)               | 1.624 (0.678,<br>4.049)               | 1.696 (0.835,<br>3.671)               | <b>3.339 (1.148,</b><br><b>10.778)</b> | 1.548 (0.708,<br>3.594)               | 1.375 (0.482,<br>3.845)               | 2.454 (0.909,<br>6.888) | <b>6.726 (1.432,</b><br><b>63.135)</b> | 2.368 (0.982,<br>6.186)               | 1.905 (0.760,<br>4.867)               | <b>6.005 (2.466,</b><br><b>15.812)</b> | <b>3.840 (1.149,</b><br><b>14.142)</b> | 1.774 (0.852,<br>3.852) | VIL                     |     |  |  |
| <b>0.518 (0.335,</b><br><b>0.799)</b> | 0.743 (0.401,<br>1.371)               | 1.312 (0.532,<br>3.543) | 0.708 (0.348,<br>1.432)               | 1.298 (0.717,<br>2.428)               | 0.977 (0.546,<br>1.771)               | 1.150 (0.621,<br>2.295)               | 0.853 (0.398,<br>1.871)               | 0.885 (0.531,<br>1.559)               | 1.743 (0.683,<br>4.919)                | 0.807 (0.422,<br>1.530)               | 0.717 (0.299,<br>1.730)               | 1.276 (0.551,<br>3.023) | 3.438 (0.781,<br>28.458)               | 1.250 (0.596,<br>2.678)               | 0.995 (0.467,<br>2.163)               | <b>3.131 (1.456,</b><br><b>6.876)</b>  | 2.003 (0.684,<br>6.677)                | 0.930 (0.544,<br>1.615) | 0.519 (0.232,<br>1.153) | VOR |  |  |

## Evaluation of heterogeneity

### Network meta-analysis

Global heterogeneity was assessed by means of  $\tau^2$  (low:  $\tau^2 \leq 0.010$ ; moderate:  $0.010 < \tau^2 \leq 0.242$ ; high:  $\tau^2 > 0.242$ ).

Huhn M, et al. Lancet 2019;394(10202):939-51

Rhodes KM, et al. J Clin Epidemiol 2015;68(1):52-60

Between study variance ( $\tau^2$ ): 0.044

Heterogeneity assessment: Moderate

### Pairwise meta-analysis

Local heterogeneity was assessed by means of  $I^2$ .

0% to 40%: might not be important, 30% to 60%: may represent moderate heterogeneity, 50% to 90%: may represent substantial heterogeneity, and 75% to 100%: considerable heterogeneity.

|             | Risk ratio (95% confidence interval) | $I^2$ |
|-------------|--------------------------------------|-------|
| AGO vs PLA  | <b>0.699 (0.491, 0.996)</b>          | 89.0% |
| AMI vs PLA  | <b>0.398 (0.191, 0.833)</b>          | na    |
| BUP vs PLA  | 0.725 (0.466, 1.127)                 | na    |
| CIT vs PLA  | <b>0.398 (0.273, 0.580)</b>          | 51.4% |
| DES vs PLA  | <b>0.526 (0.376, 0.736)</b>          | 2.0%  |
| DUL vs PLA  | <b>0.451 (0.297, 0.685)</b>          | 0.0%  |
| ESC vs PLA  | 0.604 (0.357, 1.023)                 | na    |
| FLUO vs PLA | <b>0.585 (0.445, 0.771)</b>          | 0.0%  |
| FLUV vs PLA | <b>0.300 (0.130, 0.693)</b>          | na    |
| LEV vs PLA  | <b>0.632 (0.419, 0.953)</b>          | 0.0%  |
| MIL vs PLA  | 0.721 (0.358, 1.452)                 | na    |



|            |                             |       |
|------------|-----------------------------|-------|
| MIR vs PLA | <b>0.409 (0.215, 0.778)</b> | na    |
| NEF vs PLA | <b>0.169 (0.038, 0.759)</b> | na    |
| PAR vs PLA | <b>0.445 (0.249, 0.794)</b> | 66.9% |
| REB vs PLA | <b>0.523 (0.310, 0.884)</b> | na    |
| SER vs PLA | <b>0.170 (0.093, 0.309)</b> | 0.0%  |
| TIA vs PLA | <b>0.267 (0.101, 0.703)</b> | na    |
| VEN vs PLA | <b>0.560 (0.415, 0.755)</b> | 29.5% |
| VIL vs PLA | 0.983 (0.552, 1.752)        | na    |
| VOR vs PLA | <b>0.516 (0.358, 0.743)</b> | 0.0%  |

**Forest plot (vs placebo, the numbers are risk ratios with 95% confidence interval)**

Treatments are ranked according to their SUCRA.

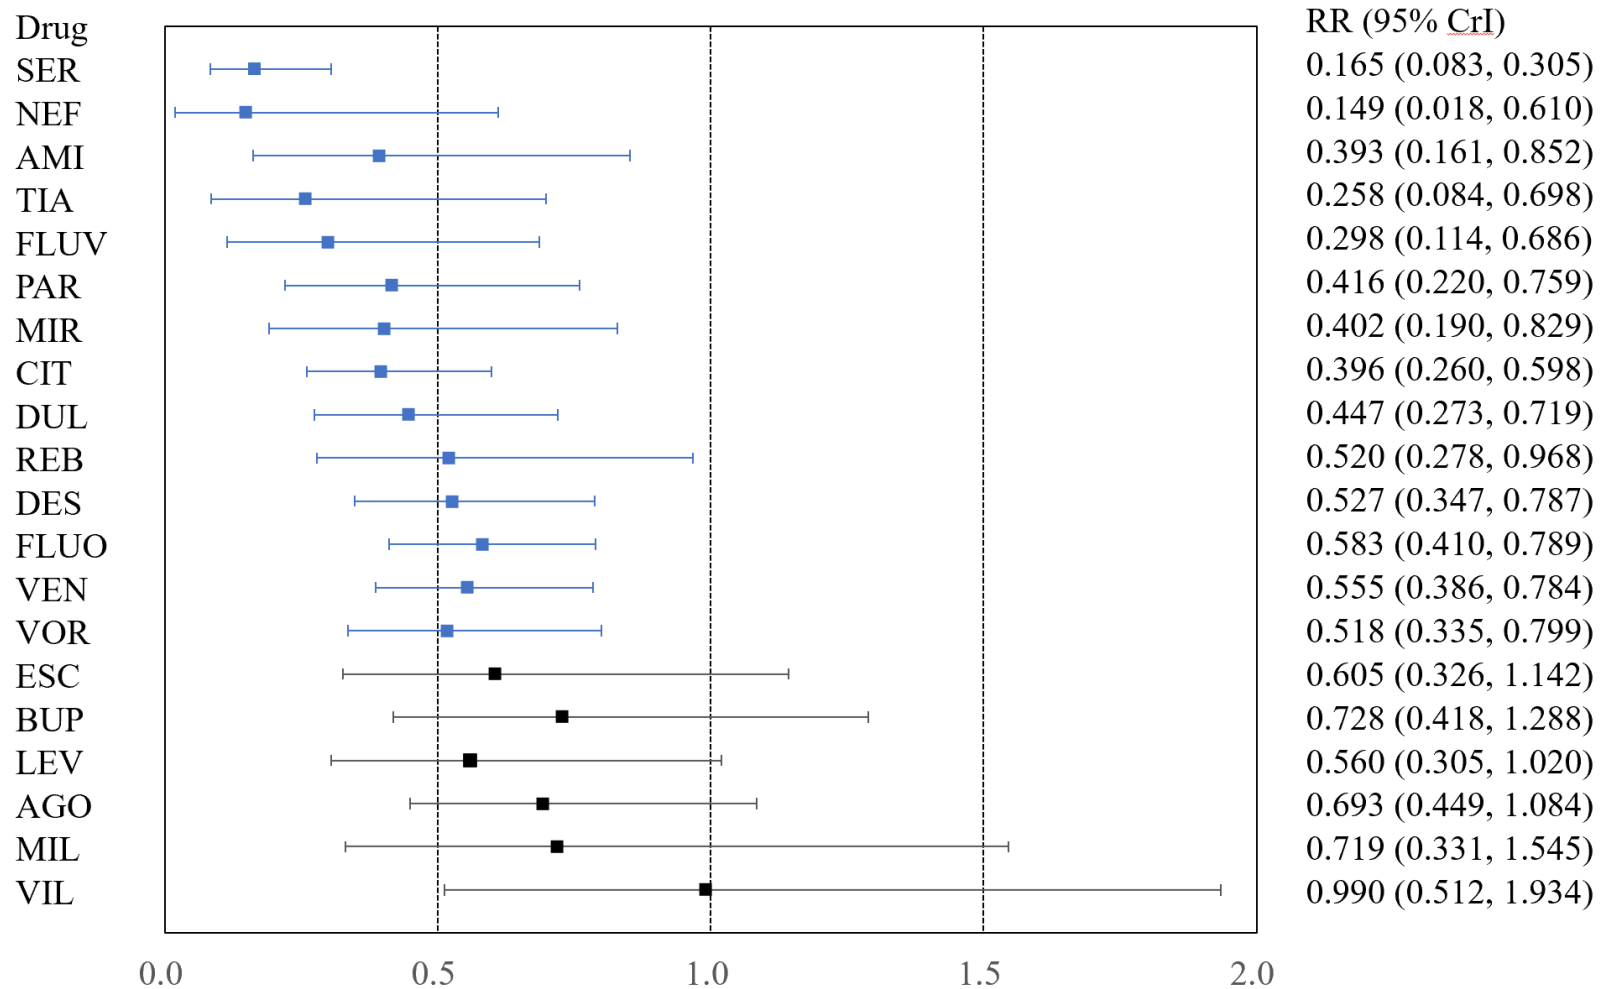

### Funnel plot (only double-blind, placebo-controlled trials)

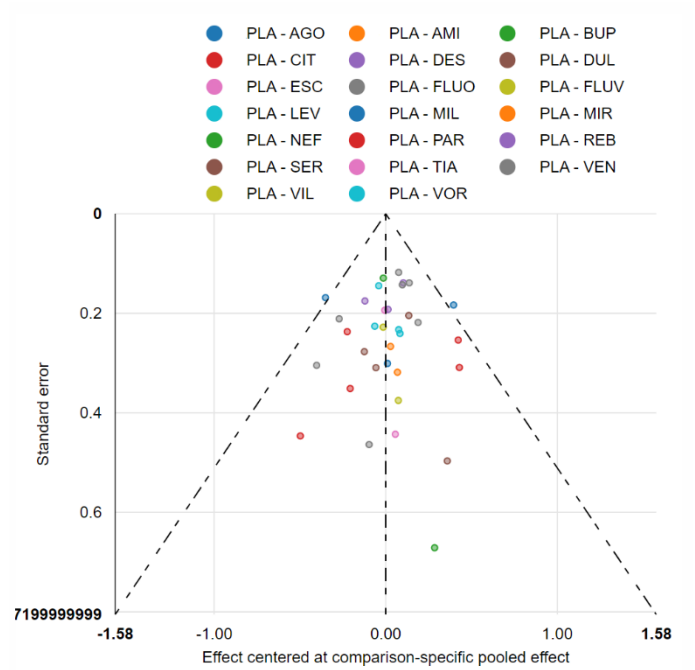

**Meta-regression analysis (the placebo was the control)**

|                                       | $\tau^2$ | $\beta$ , median (95% CrI) |
|---------------------------------------|----------|----------------------------|
| Mean age (K = 32)                     | 0.035    | -0.302 (-0.716, 0.084)     |
| Proportion of females (K = 33)        | 0.052    | -0.190 (-0.651, 0.251)     |
| Number of episodes (K = 18)           | 0.211    | 1.007 (-2.121, 3.922)      |
| Total number of participants (K= 34)  | 0.054    | 0.082 (-0.409, 0.553)      |
| Patient status (K= 26)                | 0.070    | -0.096 (-1.031, 0.865)     |
| Publication year (K= 34)              | 0.051    | 0.347 (-0.365, 1.175)      |
| Sponsorship (K= 34)                   | 0.048    | 0.338 (-0.200, 0.992)      |
| Duration of preliminary phase (K= 34) | 0.037    | -0.168 (-0.473, 0.146)     |
| Country (K =33)                       | 0.050    | 0.272 (-0.137, 0.701)      |
| Discontinuation method (K = 19)       | 0.012    | -0.200 (-1.269, 1.181)     |
| Risk of bias (K= 34)                  | 0.045    | -0.352 (-4.819, 2.960)     |
| Antidepressant class (K= 34)          | 0.045    | -0.482 (-6.895, 3.552)     |
| Dosage schedule (K= 34)               | 0.052    | -0.160 (-0.874, 0.548)     |
| Antidepressant dose (K= 31)           | 0.012    | 0.132 (-0.090, 0.380)      |

$\tau^2$  value of the primary analysis was 0.044.

### **CINeMA confidence rating**

CINeMA is a web application that simplifies the evaluation of confidence in the findings from a network meta-analysis. CINeMA is based on a methodological framework described in the following articles, which consider the following six domains: within-study bias, reporting bias, indirectness, imprecision, heterogeneity, and incoherence. CINeMA grades the confidence in the results of each treatment comparison as high, moderate, low, or very low.

Nikolakopoulou A, et al., PLOS Medicine 2020 17 1-19

Papakonstantinou T, et al., Campbell Systematic Reviews 2020 16 e1080

(1) Within-study bias: Risk of bias in RCTs for the main outcomes was assessed independently using the Cochrane risk-of-bias tool for randomized trials (RoB 2).

<https://www.riskofbias.info/welcome>

(2) Reporting bias: Comparison-adjusted funnel plots with less than 10 studies are not meaningful. Therefore, all comparisons were “Suspected.”

(3) Indirectness: No indirectness was assumed. Selected rule: Average

(4) Imprecision: For placebo comparisons the clinically meaningful threshold was set at a risk ratio of higher or lower than 1. For comparisons of two antidepressants the clinically meaningful threshold was set at risk ratio of 0.8 and 1.25.

(5) Heterogeneity: We used recommendations automatically provided by CINeMA.

(6) Incoherence: We used recommendations automatically provided by CINeMA. If the comparison had only indirect evidence, the comparison was downgraded one level.

| Comparison  | Number of studies | Within-study bias | Reporting bias | Indirectness | Imprecision    | Heterogeneity  | Incoherence    | Confidence rating |
|-------------|-------------------|-------------------|----------------|--------------|----------------|----------------|----------------|-------------------|
| AGO vs PLA  | 2                 | Some concerns     | Some concerns  | No concerns  | Major concerns | Major concerns | Major concerns | Very low          |
| AMI vs PLA  | 1                 | Some concerns     | Some concerns  | No concerns  | No concerns    | No concerns    | Major concerns | Very low          |
| BUP vs PLA  | 1                 | Some concerns     | Some concerns  | No concerns  | Major concerns | No concerns    | Major concerns | Very low          |
| CIT vs PLA  | 3                 | Some concerns     | Some concerns  | No concerns  | No concerns    | No concerns    | Major concerns | Very low          |
| DES vs PLA  | 2                 | Some concerns     | Some concerns  | No concerns  | No concerns    | No concerns    | Major concerns | Very low          |
| DUL vs PLA  | 2                 | Some concerns     | Some concerns  | No concerns  | No concerns    | No concerns    | Major concerns | Very low          |
| ESC vs PLA  | 1                 | Some concerns     | Some concerns  | No concerns  | Major concerns | No concerns    | Major concerns | Very low          |
| FLUO vs PLA | 4                 | Some concerns     | Some concerns  | No concerns  | Major concerns | No concerns    | Major concerns | Very low          |
| FLUV vs PLA | 1                 | Some concerns     | Some concerns  | No concerns  | No concerns    | No concerns    | Major concerns | Very low          |
| LEV vs PLA  | 2                 | No concerns       | Some concerns  | No concerns  | Major concerns | Major concerns | Major concerns | Very low          |
| MIL vs PLA  | 1                 | Some concerns     | Some concerns  | No concerns  | Major concerns | No concerns    | Major concerns | Very low          |
| MIR vs PLA  | 1                 | Some concerns     | Some concerns  | No concerns  | No concerns    | No concerns    | Major concerns | Very low          |
| NEF vs PLA  | 1                 | Some concerns     | Some concerns  | No concerns  | No concerns    | No concerns    | Major concerns | Very low          |
| PAR vs PLA  | 2                 | Some concerns     | Some concerns  | No concerns  | No concerns    | No concerns    | Major concerns | Very low          |
| REB vs PLA  | 1                 | Some concerns     | Some concerns  | No concerns  | No concerns    | Major concerns | Major concerns | Very low          |
| SER vs PLA  | 2                 | Some concerns     | Some concerns  | No concerns  | No concerns    | No concerns    | Major concerns | Very low          |
| TIA vs PLA  | 1                 | Some concerns     | Some concerns  | No concerns  | No concerns    | No concerns    | Major concerns | Very low          |
| VEN vs PLA  | 3                 | Some concerns     | Some concerns  | No concerns  | No concerns    | No concerns    | Major concerns | Very low          |
| VIL vs PLA  | 1                 | No concerns       | Some concerns  | No concerns  | Major concerns | No concerns    | Major concerns | Very low          |
| VOR vs PLA  | 2                 | No concerns       | Some concerns  | No concerns  | No concerns    | No concerns    | Major concerns | Low               |
| AGO vs AMI  | 0                 | Some concerns     | Some concerns  | No concerns  | No concerns    | No concerns    | Major concerns | Very low          |
| AGO vs BUP  | 0                 | Some concerns     | Some concerns  | No concerns  | Major concern  | No concerns    | Major concerns | Very low          |
| AGO vs CIT  | 0                 | Some concerns     | Some concerns  | No concerns  | No concerns    | Major concerns | Major concerns | Very low          |
| AGO vs DES  | 0                 | Some concerns     | Some concerns  | No concerns  | No concerns    | No concerns    | Major concerns | Very low          |

















|            |   |               |               |             |                |                |                |          |
|------------|---|---------------|---------------|-------------|----------------|----------------|----------------|----------|
| REB vs VOR | 0 | Some concerns | Some concerns | No concerns | Major concerns | No concerns    | Major concerns | Very low |
| SER vs TIA | 0 | Some concerns | Some concerns | No concerns | No concerns    | No concerns    | Major concerns | Very low |
| SER vs VEN | 0 | Some concerns | Some concerns | No concerns | No concerns    | No concerns    | Major concerns | Very low |
| SER vs VIL | 0 | Some concerns | Some concerns | No concerns | No concerns    | No concerns    | Major concerns | Very low |
| SER vs VOR | 0 | Some concerns | Some concerns | No concerns | No concerns    | No concerns    | Major concerns | Very low |
| TIA vs VEN | 0 | Some concerns | Some concerns | No concerns | No concerns    | No concerns    | Major concerns | Very low |
| TIA vs VIL | 0 | Some concerns | Some concerns | No concerns | No concerns    | Major concerns | Major concerns | Very low |
| TIA vs VOR | 0 | Some concerns | Some concerns | No concerns | No concerns    | No concerns    | Major concerns | Very low |
| VEN vs VIL | 0 | Some concerns | Some concerns | No concerns | No concerns    | No concerns    | Major concerns | Very low |
| VEN vs VOR | 0 | Some concerns | Some concerns | No concerns | Major concerns | No concerns    | Major concerns | Very low |
| VIL vs VOR | 0 | No concerns   | Some concerns | No concerns | No concerns    | No concerns    | Major concerns | Very low |

## Appendix S2. All-cause discontinuation (K = 28, n = 8317).

League table (risk ratio with 95% credible interval)

|                             |                      |                      |                             |                      |                      |                      |                             |                      |                      |                      |     |  |  |  |  |  |
|-----------------------------|----------------------|----------------------|-----------------------------|----------------------|----------------------|----------------------|-----------------------------|----------------------|----------------------|----------------------|-----|--|--|--|--|--|
| PLA                         |                      |                      |                             |                      |                      |                      |                             |                      |                      |                      |     |  |  |  |  |  |
| 0.778 (0.542, 1.111)        | AGO                  |                      |                             |                      |                      |                      |                             |                      |                      |                      |     |  |  |  |  |  |
| 0.787 (0.500, 1.238)        | 1.010 (0.572, 1.815) | BUP                  |                             |                      |                      |                      |                             |                      |                      |                      |     |  |  |  |  |  |
| <b>0.589 (0.417, 0.834)</b> | 0.758 (0.464, 1.250) | 0.748 (0.429, 1.331) | DES                         |                      |                      |                      |                             |                      |                      |                      |     |  |  |  |  |  |
| 0.784 (0.544, 1.156)        | 1.010 (0.604, 1.718) | 1.003 (0.566, 1.814) | 1.336 (0.805, 2.246)        | DUL                  |                      |                      |                             |                      |                      |                      |     |  |  |  |  |  |
| 0.742 (0.467, 1.159)        | 0.954 (0.527, 1.706) | 0.944 (0.489, 1.791) | 1.257 (0.706, 2.204)        | 0.950 (0.513, 1.670) | ESC                  |                      |                             |                      |                      |                      |     |  |  |  |  |  |
| 0.863 (0.657, 1.137)        | 1.114 (0.711, 1.754) | 1.098 (0.654, 1.856) | 1.468 (0.936, 2.271)        | 1.096 (0.691, 1.752) | 1.165 (0.692, 1.984) | FLUO                 |                             |                      |                      |                      |     |  |  |  |  |  |
| 1.207 (0.774, 1.852)        | 1.548 (0.886, 2.713) | 1.530 (0.806, 2.892) | <b>2.040 (1.166, 3.523)</b> | 1.530 (0.847, 2.711) | 1.628 (0.866, 3.045) | 1.398 (0.824, 2.343) | LEV                         |                      |                      |                      |     |  |  |  |  |  |
| 0.726 (0.430, 1.199)        | 0.934 (0.495, 1.766) | 0.918 (0.463, 1.851) | 1.233 (0.657, 2.278)        | 0.919 (0.480, 1.733) | 0.976 (0.490, 1.925) | 0.838 (0.466, 1.476) | 0.603 (0.304, 1.194)        | MIL                  |                      |                      |     |  |  |  |  |  |
| 0.857 (0.490, 1.504)        | 1.102 (0.560, 2.128) | 1.093 (0.529, 2.243) | 1.455 (0.746, 2.806)        | 1.089 (0.545, 2.085) | 1.155 (0.572, 2.428) | 0.996 (0.533, 1.820) | 0.711 (0.351, 1.455)        | 1.185 (0.558, 2.533) | NEF                  |                      |     |  |  |  |  |  |
| <b>0.523 (0.327, 0.817)</b> | 0.674 (0.379, 1.178) | 0.667 (0.348, 1.251) | 0.886 (0.495, 1.548)        | 0.666 (0.364, 1.171) | 0.706 (0.374, 1.348) | 0.603 (0.353, 1.008) | <b>0.432 (0.230, 0.820)</b> | 0.723 (0.357, 1.448) | 0.608 (0.301, 1.246) | PAR                  |     |  |  |  |  |  |
| 0.843 (0.526, 1.360)        | 1.085 (0.600, 1.956) | 1.074 (0.559, 2.053) | 1.424 (0.801, 2.599)        | 1.070 (0.584, 1.948) | 1.139 (0.594, 2.223) | 0.974 (0.565, 1.698) | 0.701 (0.370, 1.327)        | 1.160 (0.587, 2.392) | 0.982 (0.471, 2.097) | 1.614 (0.844, 3.167) | REB |  |  |  |  |  |

|                             |                      |                      |                             |                      |                      |                      |                             |                      |                      |                             |                      |                      |                      |                             |                      |     |
|-----------------------------|----------------------|----------------------|-----------------------------|----------------------|----------------------|----------------------|-----------------------------|----------------------|----------------------|-----------------------------|----------------------|----------------------|----------------------|-----------------------------|----------------------|-----|
| <b>0.681 (0.492, 0.961)</b> | 0.875 (0.548, 1.445) | 0.865 (0.504, 1.523) | 1.152 (0.719, 1.891)        | 0.865 (0.528, 1.442) | 0.918 (0.536, 1.625) | 0.786 (0.515, 1.214) | <b>0.566 (0.332, 0.990)</b> | 0.939 (0.514, 1.792) | 0.795 (0.419, 1.564) | 1.307 (0.758, 2.318)        | 0.807 (0.458, 1.435) | SER                  |                      |                             |                      |     |
| 0.667 (0.407, 1.102)        | 0.862 (0.466, 1.554) | 0.848 (0.444, 1.674) | 1.132 (0.631, 2.083)        | 0.851 (0.453, 1.584) | 0.899 (0.462, 1.743) | 0.773 (0.436, 1.363) | 0.555 (0.287, 1.081)        | 0.924 (0.449, 1.883) | 0.778 (0.375, 1.661) | 1.269 (0.665, 2.479)        | 0.793 (0.391, 1.529) | 0.983 (0.542, 1.752) | TIA                  |                             |                      |     |
| <b>0.681 (0.522, 0.883)</b> | 0.874 (0.560, 1.370) | 0.868 (0.507, 1.464) | 1.157 (0.752, 1.798)        | 0.866 (0.547, 1.351) | 0.921 (0.548, 1.549) | 0.788 (0.535, 1.153) | <b>0.567 (0.338, 0.960)</b> | 0.939 (0.526, 1.694) | 0.795 (0.428, 1.504) | 1.304 (0.777, 2.217)        | 0.808 (0.470, 1.372) | 1.002 (0.644, 1.511) | 1.020 (0.583, 1.780) | VEN                         |                      |     |
| 1.209 (0.744, 1.976)        | 1.558 (0.849, 2.872) | 1.542 (0.785, 3.008) | <b>2.050 (1.132, 3.718)</b> | 1.543 (0.819, 2.843) | 1.628 (0.843, 3.240) | 1.396 (0.811, 2.448) | 1.010 (0.521, 2.012)        | 1.676 (0.808, 3.521) | 1.412 (0.669, 2.970) | <b>2.317 (1.190, 4.572)</b> | 1.436 (0.731, 2.854) | 1.777 (0.986, 3.185) | 1.813 (0.904, 3.618) | <b>1.774 (1.020, 3.112)</b> | VIL                  |     |
| <b>0.768 (0.518, 0.998)</b> | 0.922 (0.565, 1.504) | 0.910 (0.528, 1.607) | 1.215 (0.756, 1.962)        | 0.909 (0.558, 1.479) | 0.968 (0.551, 1.705) | 0.828 (0.543, 1.283) | 0.594 (0.347, 1.043)        | 0.987 (0.542, 1.831) | 0.838 (0.448, 1.612) | 1.372 (0.794, 2.415)        | 0.850 (0.470, 1.503) | 1.051 (0.658, 1.669) | 1.071 (0.589, 1.927) | 1.047 (0.690, 1.613)        | 0.591 (0.326, 1.078) | VOR |

## Evaluation of heterogeneity

### Network meta-analysis

Between study variance ( $\tau^2$ ): 0.030

Heterogeneity assessment: Moderate

### Pairwise meta-analysis

|             | Risk ratio (95% confidence interval) | I <sup>2</sup> |
|-------------|--------------------------------------|----------------|
| AGO vs PLA  | 0.778 (0.583, 1.040)                 | 75.5%          |
| BUP vs PLA  | 0.783 (0.558, 1.101)                 | na             |
| DES vs PLA  | <b>0.592 (0.451, 0.777)</b>          | 0.0%           |
| DUL vs PLA  | 0.787 (0.576, 1.073)                 | 18.2%          |
| ESC vs PLA  | 0.738 (0.519, 1.047)                 | na             |
| FLUO vs PLA | 0.868 (0.694, 1.084)                 | 80.8%          |
| LEV vs PLA  | 1.198 (0.806, 1.779)                 | 0.0%           |



|            |                             |       |
|------------|-----------------------------|-------|
| MIL vs PLA | 0.725 (0.472, 1.112)        | na    |
| NEF vs PLA | 0.857 (0.533, 1.377)        | na    |
| PAR vs PLA | <b>0.520 (0.346, 0.780)</b> | 0.0%  |
| REB vs PLA | 0.844 (0.585, 1.220)        | na    |
| SER vs PLA | <b>0.684 (0.528, 0.885)</b> | 37.7% |
| TIA vs PLA | <b>0.667 (0.450, 0.987)</b> | na    |
| VEN vs PLA | <b>0.682 (0.559, 0.832)</b> | 0.0%  |
| VIL vs PLA | 1.207 (0.822, 1.774)        | na    |
| VOR vs PLA | <b>0.771 (0.601, 0.988)</b> | 28.7% |

**Forest plot (vs placebo, the numbers are risk ratios with 95% credible interval)**

Treatments are ranked according to their SCURA.

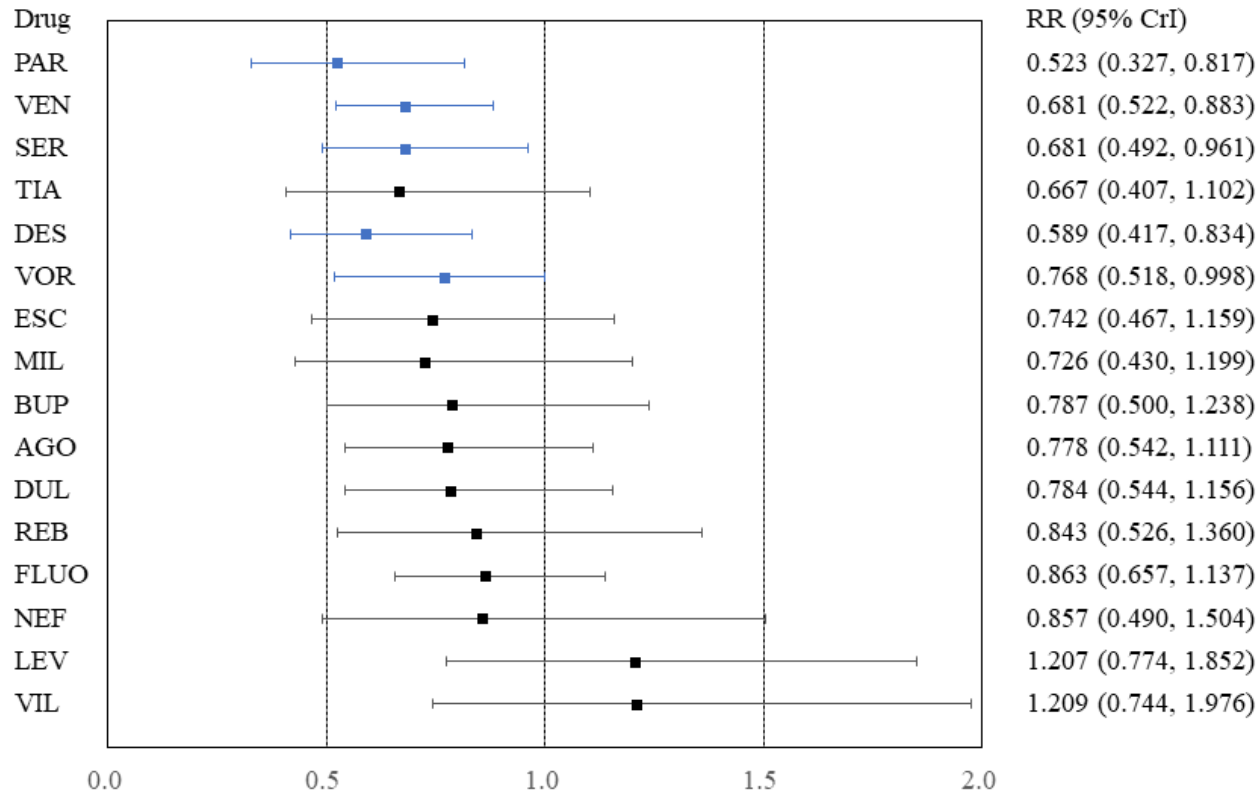

### Appendix S3. Discontinuation due to adverse events (K = 27, n = 8152).

League table (risk ratio with 95% credible interval)

|                       |                       |                             |                                |                       |                                |                       |                       |                             |                            |                       |     |  |  |  |  |
|-----------------------|-----------------------|-----------------------------|--------------------------------|-----------------------|--------------------------------|-----------------------|-----------------------|-----------------------------|----------------------------|-----------------------|-----|--|--|--|--|
| PLA                   |                       |                             |                                |                       |                                |                       |                       |                             |                            |                       |     |  |  |  |  |
| 1.247 (0.272, 6.608)  | AGO                   |                             |                                |                       |                                |                       |                       |                             |                            |                       |     |  |  |  |  |
| 4.364 (0.780, 35.958) | 3.652 (0.340, 43.466) | BUP                         |                                |                       |                                |                       |                       |                             |                            |                       |     |  |  |  |  |
| 0.528 (0.186, 1.199)  | 0.416 (0.059, 2.320)  | <b>0.119 (0.011, 0.775)</b> | DES                            |                       |                                |                       |                       |                             |                            |                       |     |  |  |  |  |
| 1.427 (0.443, 4.875)  | 1.155 (0.144, 8.167)  | 0.325 (0.028, 2.576)        | 2.725 (0.705, 14.017)          | DUL                   |                                |                       |                       |                             |                            |                       |     |  |  |  |  |
| 0.530 (0.114, 2.163)  | 0.423 (0.047, 3.277)  | 0.119 (0.009, 1.109)        | 1.013 (0.183, 5.803)           | 0.363 (0.052, 2.231)  | ESC                            |                       |                       |                             |                            |                       |     |  |  |  |  |
| 2.296 (0.402, 20.441) | 1.839 (0.167, 27.670) | 0.523 (0.033, 7.640)        | 4.514 (0.679, 48.343)          | 1.614 (0.200, 18.069) | 4.567 (0.480, 57.855)          | FLUO                  |                       |                             |                            |                       |     |  |  |  |  |
| 1.789 (0.557, 6.891)  | 1.439 (0.196, 10.820) | 0.390 (0.037, 3.700)        | 3.441 (0.817, 18.673)          | 1.243 (0.223, 7.690)  | 3.427 (0.553, 25.164)          | 0.795 (0.069, 6.931)  | LEV                   |                             |                            |                       |     |  |  |  |  |
| 5.538 (0.966, 48.933) | 4.564 (0.372, 59.035) | 1.266 (0.081, 19.481)       | <b>10.796 (1.563, 122.996)</b> | 3.901 (0.494, 45.122) | <b>10.756 (1.157, 150.367)</b> | 2.441 (0.156, 42.772) | 3.166 (0.339, 34.040) | MIR                         |                            |                       |     |  |  |  |  |
| 0.230 (0.005, 2.805)  | 0.174 (0.003, 3.659)  | 0.050 (0.001, 1.090)        | 0.442 (0.009, 6.788)           | 0.161 (0.003, 2.549)  | 0.436 (0.008, 8.837)           | 0.097 (0.001, 2.307)  | 0.125 (0.002, 2.043)  | <b>0.038 (0.001, 0.856)</b> | NEF                        |                       |     |  |  |  |  |
| 1.790 (0.303, 11.628) | 1.482 (0.118, 14.897) | 0.387 (0.026, 4.982)        | 3.491 (0.498, 28.246)          | 1.263 (0.137, 11.375) | 3.403 (0.348, 38.781)          | 0.772 (0.044, 9.976)  | 0.985 (0.104, 8.417)  | 0.317 (0.019, 3.973)        | 8.074 (0.353, 419.030)     | PAR                   |     |  |  |  |  |
| 3.343 (0.530, 30.667) | 2.664 (0.231, 37.525) | 0.743 (0.047, 13.040)       | 6.491 (0.886, 70.662)          | 2.281 (0.265, 27.275) | 6.491 (0.654, 89.395)          | 1.417 (0.095, 22.723) | 1.871 (0.190, 22.618) | 0.598 (0.034, 9.674)        | 15.563 (0.626, 1, 026.783) | 1.836 (0.137, 32.895) | REB |  |  |  |  |

|                                        |                          |                                       |                                        |                          |                                        |                          |                          |                                       |                                          |                          |                          |                                       |                                        |                          |     |
|----------------------------------------|--------------------------|---------------------------------------|----------------------------------------|--------------------------|----------------------------------------|--------------------------|--------------------------|---------------------------------------|------------------------------------------|--------------------------|--------------------------|---------------------------------------|----------------------------------------|--------------------------|-----|
| <b>4.447 (1.161,</b><br><b>23.812)</b> | 3.682 (0.427,<br>32.837) | 0.986 (0.085,<br>11.267)              | <b>8.636 (1.751,</b><br><b>61.770)</b> | 3.085 (0.528,<br>24.134) | <b>8.513 (1.327,</b><br><b>78.867)</b> | 1.968 (0.159,<br>21.842) | 2.547 (0.366,<br>18.785) | 0.799 (0.067,<br>9.376)               | <b>20.141 (1.110,</b><br><b>172.628)</b> | 2.508 (0.267,<br>27.907) | 1.383 (0.108,<br>15.954) | SER                                   |                                        |                          |     |
| 0.583 (0.260,<br>1.268)                | 0.462 (0.073,<br>2.481)  | <b>0.131 (0.014,</b><br><b>0.880)</b> | 1.102 (0.361,<br>4.115)                | 0.411 (0.093,<br>1.636)  | 1.107 (0.218,<br>6.270)                | 0.250 (0.026,<br>1.695)  | 0.330 (0.068,<br>1.273)  | <b>0.105 (0.011,</b><br><b>0.664)</b> | 2.563 (0.185,<br>119.048)                | 0.319 (0.044,<br>2.239)  | 0.172 (0.016,<br>1.276)  | <b>0.129 (0.021,</b><br><b>0.602)</b> | VEN                                    |                          |     |
| 1.444 (0.230,<br>13.077)               | 1.160 (0.092,<br>17.200) | 0.317 (0.020,<br>5.298)               | 2.808 (0.369,<br>33.237)               | 1.005 (0.107,<br>11.441) | 2.786 (0.265,<br>37.414)               | 0.629 (0.037,<br>10.429) | 0.811 (0.080,<br>9.209)  | 0.251 (0.014,<br>4.592)               | 6.432 (0.260,<br>468.132)                | 0.806 (0.059,<br>13.202) | 0.424 (0.026,<br>7.249)  | 0.318 (0.026,<br>4.626)               | 2.463 (0.336,<br>26.329)               | VIL                      |     |
| 2.096 (0.767,<br>6.092)                | 1.692 (0.237,<br>10.607) | 0.481 (0.046,<br>3.783)               | <b>4.039 (1.116,</b><br><b>18.330)</b> | 1.471 (0.315,<br>7.021)  | 4.049 (0.739,<br>24.892)               | 0.910 (0.087,<br>6.722)  | 1.199 (0.211,<br>5.799)  | 0.370 (0.034,<br>2.847)               | 9.391 (0.651,<br>493.497)                | 1.195 (0.144,<br>10.160) | 0.630 (0.057,<br>5.177)  | 0.469 (0.070,<br>2.737)               | <b>3.625 (1.001,</b><br><b>14.211)</b> | 1.479 (0.123,<br>12.926) | VOR |

## Evaluation of heterogeneity

### Network meta-analysis

Between study variance ( $\tau^2$ ): 0.102

Heterogeneity assessment: Moderate

### Pairwise meta-analysis

|             | Risk ratio (95% confidence interval) | I <sup>2</sup> |
|-------------|--------------------------------------|----------------|
| AGO vs PLA  | 1.214 (0.253, 5.818)                 | 61.4%          |
| BUP vs PLA  | 4.057 (0.872, 18.882)                | na             |
| DES vs PLA  | <b>0.576 (0.355, 0.934)</b>          | 0.0%           |
| DUL vs PLA  | 1.375 (0.554, 3.412)                 | 0.0%           |
| ESC vs PLA  | 0.514 (0.186, 1.421)                 | na             |
| FLUO vs PLA | 1.931 (0.438, 8.510)                 | na             |
| LEV vs PLA  | 1.643 (0.593, 4.551)                 | 0.0%           |
| MIR vs PLA  | <b>4.737 (1.057, 21.221)</b>         | na             |
| NEF vs PLA  | 0.338 (0.036, 3.170)                 | na             |

|            |                              |       |
|------------|------------------------------|-------|
| PAR vs PLA | 1.642 (0.409, 6.600)         | na    |
| REB vs PLA | 2.917 (0.599, 14.212)        | na    |
| SER vs PLA | <b>3.504 (1.015, 12.104)</b> | 15.9% |
| VEN vs PLA | 0.604 (0.358, 1.019)         | 0.0%  |
| VIL vs PLA | 1.290 (0.253, 6.589)         | na    |
| VOR vs PLA | 2.020 (0.971, 4.203)         | 29.4% |

**Forest plot (vs placebo, the numbers are risk ratios with 95% credible interval)**

Treatments are ranked according to their SCURA.

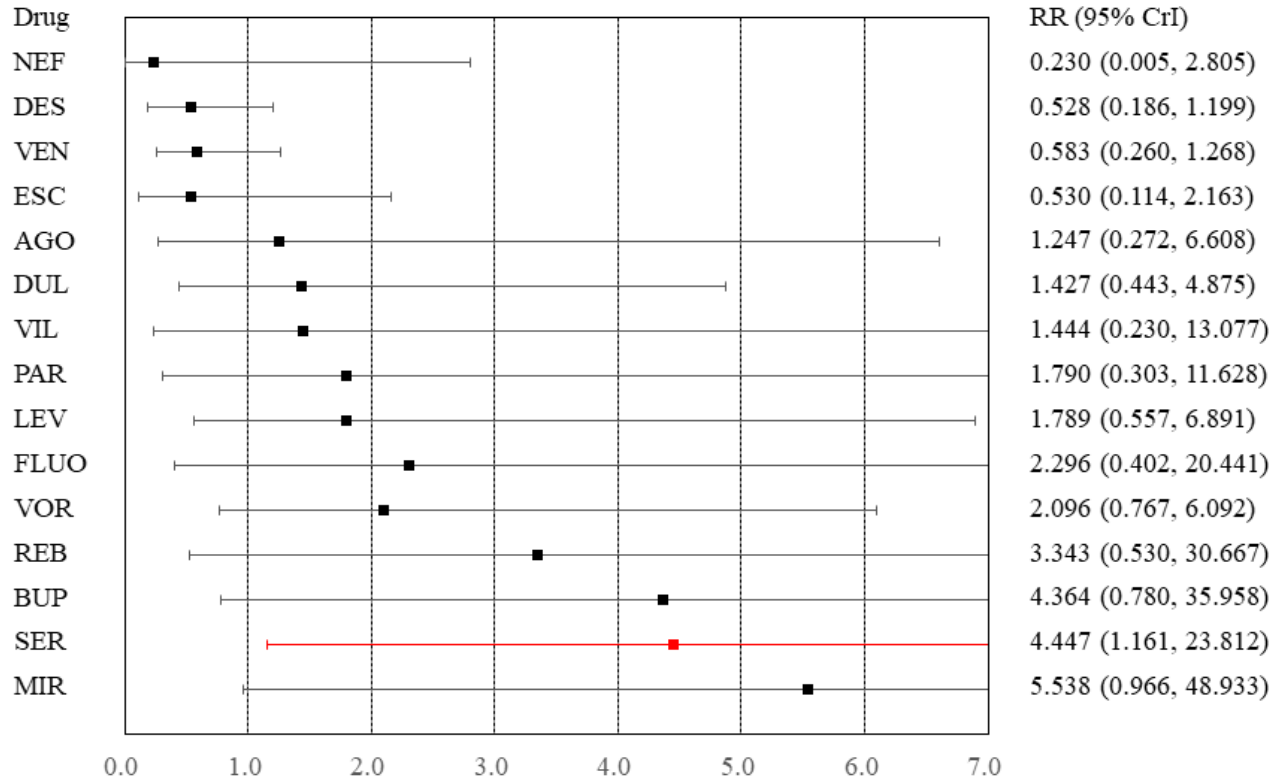

## Appendix S4. Nausea/vomiting (K = 20, n = 6259).

### League table (risk ratio with 95% credible interval)

|                             |                              |                              |                             |                       |                       |                              |                              |                      |                      |                      |                      |                       |     |  |  |  |  |  |  |
|-----------------------------|------------------------------|------------------------------|-----------------------------|-----------------------|-----------------------|------------------------------|------------------------------|----------------------|----------------------|----------------------|----------------------|-----------------------|-----|--|--|--|--|--|--|
| PLA                         |                              |                              |                             |                       |                       |                              |                              |                      |                      |                      |                      |                       |     |  |  |  |  |  |  |
| 0.428 (0.042, 2.656)        | BUP                          |                              |                             |                       |                       |                              |                              |                      |                      |                      |                      |                       |     |  |  |  |  |  |  |
| 0.627 (0.248, 1.584)        | 1.480 (0.204, 17.965)        | CIT                          |                             |                       |                       |                              |                              |                      |                      |                      |                      |                       |     |  |  |  |  |  |  |
| <b>3.011 (1.121, 8.879)</b> | 7.127 (0.860, 91.015)        | <b>4.843 (1.243, 19.758)</b> | DES                         |                       |                       |                              |                              |                      |                      |                      |                      |                       |     |  |  |  |  |  |  |
| 1.258 (0.469, 3.579)        | 3.016 (0.382, 36.949)        | 2.013 (0.523, 7.801)         | 0.421 (0.095, 1.802)        | DUL                   |                       |                              |                              |                      |                      |                      |                      |                       |     |  |  |  |  |  |  |
| 1.297 (0.383, 5.715)        | 3.149 (0.326, 49.326)        | 2.086 (0.456, 11.515)        | 0.428 (0.085, 2.680)        | 1.047 (0.201, 5.920)  | ESC                   |                              |                              |                      |                      |                      |                      |                       |     |  |  |  |  |  |  |
| 0.840 (0.401, 1.830)        | 1.980 (0.291, 21.680)        | 1.336 (0.418, 4.481)         | <b>0.279 (0.073, 0.990)</b> | 0.668 (0.179, 2.317)  | 0.642 (0.124, 2.753)  | FLUO                         |                              |                      |                      |                      |                      |                       |     |  |  |  |  |  |  |
| 0.368 (0.094, 1.258)        | 0.881 (0.089, 10.669)        | 0.591 (0.119, 2.680)         | <b>0.121 (0.021, 0.566)</b> | 0.293 (0.055, 1.395)  | 0.279 (0.039, 1.679)  | 0.445 (0.095, 1.804)         | FLUV                         |                      |                      |                      |                      |                       |     |  |  |  |  |  |  |
| 1.867 (0.792, 4.535)        | 4.389 (0.633, 51.116)        | 2.978 (0.826, 10.418)        | 0.617 (0.155, 2.344)        | 1.472 (0.375, 5.729)  | 1.425 (0.258, 6.498)  | 2.211 (0.691, 6.954)         | <b>5.058 (1.138, 25.973)</b> | LEV                  |                      |                      |                      |                       |     |  |  |  |  |  |  |
| 1.740 (0.490, 6.794)        | 4.165 (0.460, 57.187)        | 2.740 (0.579, 13.408)        | 0.580 (0.115, 3.008)        | 1.372 (0.269, 7.074)  | 1.311 (0.191, 8.473)  | 2.077 (0.474, 9.551)         | 4.743 (0.842, 31.400)        | 0.923 (0.201, 4.611) | NEF                  |                      |                      |                       |     |  |  |  |  |  |  |
| <b>2.660 (1.015, 9.065)</b> | 6.592 (0.811, 84.072)        | <b>4.326 (1.110, 19.561)</b> | 0.895 (0.216, 4.250)        | 2.135 (0.505, 9.982)  | 2.072 (0.342, 12.462) | 3.202 (0.910, 13.394)        | <b>7.477 (1.503, 44.197)</b> | 1.426 (0.384, 6.502) | 1.541 (0.305, 9.336) | SER                  |                      |                       |     |  |  |  |  |  |  |
| 1.239 (0.623, 2.436)        | 2.932 (0.424, 30.193)        | 1.972 (0.614, 6.315)         | 0.413 (0.115, 1.337)        | 0.982 (0.281, 3.159)  | 0.958 (0.178, 3.907)  | 1.465 (0.516, 4.079)         | 3.368 (0.806, 15.469)        | 0.659 (0.221, 2.000) | 0.710 (0.154, 2.957) | 0.460 (0.112, 1.556) | VEN                  |                       |     |  |  |  |  |  |  |
| 1.134 (0.368, 3.545)        | 2.662 (0.308, 34.599)        | 1.785 (0.423, 7.965)         | 0.371 (0.084, 1.663)        | 0.892 (0.193, 4.078)  | 0.877 (0.133, 4.777)  | 1.346 (0.350, 5.138)         | 3.060 (0.600, 17.458)        | 0.607 (0.149, 2.518) | 0.653 (0.116, 3.562) | 0.424 (0.079, 1.912) | 0.924 (0.248, 3.662) | VIL                   |     |  |  |  |  |  |  |
| <b>3.222 (1.380, 9.254)</b> | <b>7.799 (1.066, 86.219)</b> | <b>5.201 (1.471, 20.750)</b> | 1.080 (0.285, 4.570)        | 2.566 (0.687, 10.754) | 2.484 (0.475, 13.441) | <b>3.890 (1.192, 14.464)</b> | <b>8.980 (2.005, 48.817)</b> | 1.755 (0.505, 6.565) | 1.911 (0.358, 9.589) | 1.218 (0.263, 5.128) | 2.611 (0.871, 9.288) | 2.895 (0.715, 12.942) | VOR |  |  |  |  |  |  |

### Evaluation of heterogeneity

#### Network meta-analysis

Between study variance ( $\tau^2$ ): 0.040

Heterogeneity assessment: Moderate

#### Pairwise meta-analysis

|            | Risk ratio (95% confidence interval) | I <sup>2</sup> |
|------------|--------------------------------------|----------------|
| BUP vs PLA | 0.493 (0.091, 2.663)                 | na             |

|             |                             |      |
|-------------|-----------------------------|------|
| CIT vs PLA  | 0.630 (0.299, 1.328)        | 0.0% |
| DES vs PLA  | <b>2.921 (1.412, 6.042)</b> | na   |
| DUL vs PLA  | 1.264 (0.573, 2.790)        | na   |
| ESC vs PLA  | 1.285 (0.414, 3.985)        | na   |
| FLUO vs PLA | 0.828 (0.468, 1.464)        | 0.0% |
| FLUV vs PLA | 0.392 (0.141, 1.088)        | na   |
| LEV vs PLA  | 1.768 (0.868, 3.605)        | 0.0% |
| NEF vs PLA  | 1.625 (0.561, 4.706)        | na   |
| SER vs PLA  | 2.476 (0.985, 6.225)        | 0.0% |
| VEN vs PLA  | 1.248 (0.775, 2.008)        | 0.0% |
| VIL vs PLA  | 1.109 (0.460, 2.674)        | na   |
| VOR vs PLA  | <b>3.088 (1.438, 6.630)</b> | 0.0% |



**Forest plot (vs placebo, the numbers are risk ratios with 95% credible interval)**

Treatments are ranked according to their SCURA.

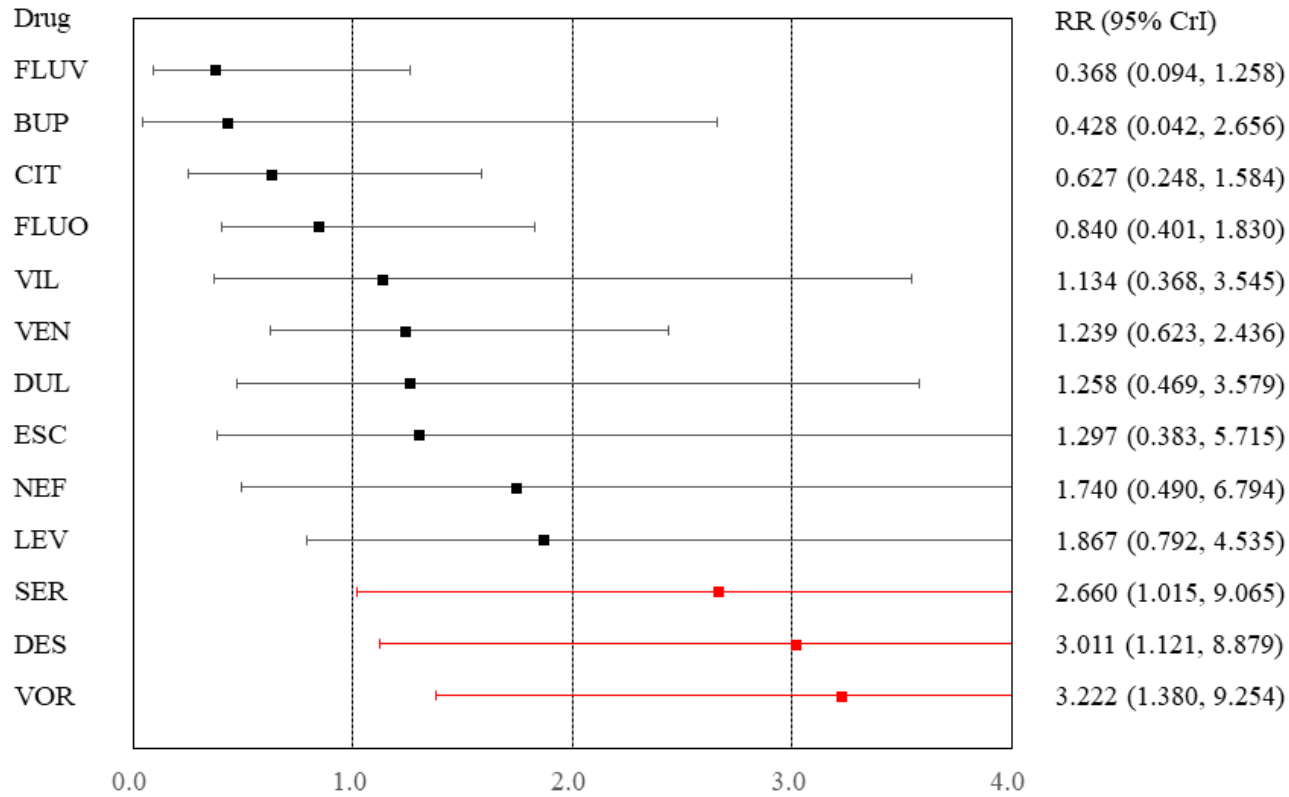

## Appendix S5. Dizziness (K = 17, n = 5326).

### League table (risk ratio with 95% credible interval)

|                             |                      |                       |                       |                       |                       |                       |                       |                       |                       |                       |     |  |
|-----------------------------|----------------------|-----------------------|-----------------------|-----------------------|-----------------------|-----------------------|-----------------------|-----------------------|-----------------------|-----------------------|-----|--|
| PLA                         |                      |                       |                       |                       |                       |                       |                       |                       |                       |                       |     |  |
| 3.589 (0.342, 159.412)      | BUP                  |                       |                       |                       |                       |                       |                       |                       |                       |                       |     |  |
| 0.666 (0.287, 1.788)        | 0.190 (0.004, 2.406) | CIT                   |                       |                       |                       |                       |                       |                       |                       |                       |     |  |
| 0.437 (0.147, 1.211)        | 0.121 (0.003, 1.597) | 0.652 (0.140, 2.332)  | DES                   |                       |                       |                       |                       |                       |                       |                       |     |  |
| 0.555 (0.153, 1.837)        | 0.147 (0.003, 2.290) | 0.811 (0.160, 3.579)  | 1.255 (0.249, 6.446)  | DUL                   |                       |                       |                       |                       |                       |                       |     |  |
| 0.818 (0.347, 1.898)        | 0.226 (0.004, 2.801) | 1.243 (0.316, 3.961)  | 1.872 (0.493, 7.360)  | 1.499 (0.339, 6.833)  | FLUO                  |                       |                       |                       |                       |                       |     |  |
| 0.317 (0.084, 1.098)        | 0.089 (0.002, 1.259) | 0.474 (0.092, 2.104)  | 0.737 (0.130, 3.662)  | 0.585 (0.092, 3.379)  | 0.389 (0.077, 1.680)  | LEV                   |                       |                       |                       |                       |     |  |
| 1.068 (0.158, 6.064)        | 0.281 (0.005, 5.396) | 1.572 (0.186, 10.523) | 2.461 (0.280, 18.555) | 1.948 (0.198, 16.664) | 1.325 (0.163, 8.860)  | 3.322 (0.366, 31.447) | MIR                   |                       |                       |                       |     |  |
| 0.799 (0.339, 1.923)        | 0.224 (0.005, 2.803) | 1.188 (0.328, 3.940)  | 1.824 (0.502, 7.525)  | 1.474 (0.332, 6.767)  | 0.980 (0.313, 3.344)  | 2.518 (0.566, 12.434) | 0.757 (0.112, 6.375)  | SER                   |                       |                       |     |  |
| <b>0.596 (0.379, 0.987)</b> | 0.164 (0.004, 2.008) | 0.885 (0.248, 2.607)  | 1.366 (0.384, 4.870)  | 1.081 (0.257, 5.379)  | 0.730 (0.240, 2.132)  | 1.850 (0.445, 8.733)  | 0.557 (0.084, 4.140)  | 0.741 (0.228, 2.250)  | VEN                   |                       |     |  |
| 0.339 (0.068, 1.592)        | 0.091 (0.002, 1.655) | 0.501 (0.075, 2.856)  | 0.763 (0.115, 5.078)  | 0.615 (0.080, 4.192)  | 0.410 (0.066, 2.316)  | 1.055 (0.139, 8.194)  | 0.309 (0.029, 3.749)  | 0.418 (0.071, 2.378)  | 0.559 (0.099, 3.196)  | VIL                   |     |  |
| 1.591 (0.314, 10.334)       | 0.434 (0.009, 9.337) | 2.393 (0.341, 18.129) | 3.684 (0.538, 32.448) | 2.909 (0.380, 28.171) | 1.938 (0.312, 15.171) | 5.086 (0.679, 50.758) | 1.472 (0.136, 20.874) | 2.008 (0.299, 15.060) | 2.704 (0.427, 19.685) | 4.958 (0.503, 50.633) | VOR |  |

### Evaluation of heterogeneity

#### Network meta-analysis

Between study variance ( $\tau^2$ ): 0.066

Heterogeneity assessment: Moderate

#### Pairwise meta-analysis

|            | Risk ratio (95% confidence interval) | I <sup>2</sup> |
|------------|--------------------------------------|----------------|
| BUP vs PLA | 2.958 (0.310, 28.208)                | na             |
| CIT vs PLA | 0.589 (0.308, 1.129)                 | 29.2%          |
| DES vs PLA | <b>0.455 (0.242, 0.856)</b>          | na             |

|             |                             |      |
|-------------|-----------------------------|------|
| DUL vs PLA  | 0.567 (0.230, 1.400)        | na   |
| FLUO vs PLA | 0.807 (0.434, 1.501)        | 7.4% |
| LEV vs PLA  | 0.340 (0.112, 1.037)        | 0.0% |
| MIR vs PLA  | 1.053 (0.219, 5.056)        | na   |
| SER vs PLA  | 0.805 (0.432, 1.499)        | 0.0% |
| VEN vs PLA  | <b>0.609 (0.404, 0.916)</b> | 0.0% |
| VIL vs PLA  | 0.345 (0.099, 1.208)        | na   |
| VOR vs PLA  | 1.569 (0.380, 6.475)        | na   |

**Forest plot (vs placebo, the numbers are risk ratios with 95% credible interval)**

Treatments are ranked according to their SCURA.

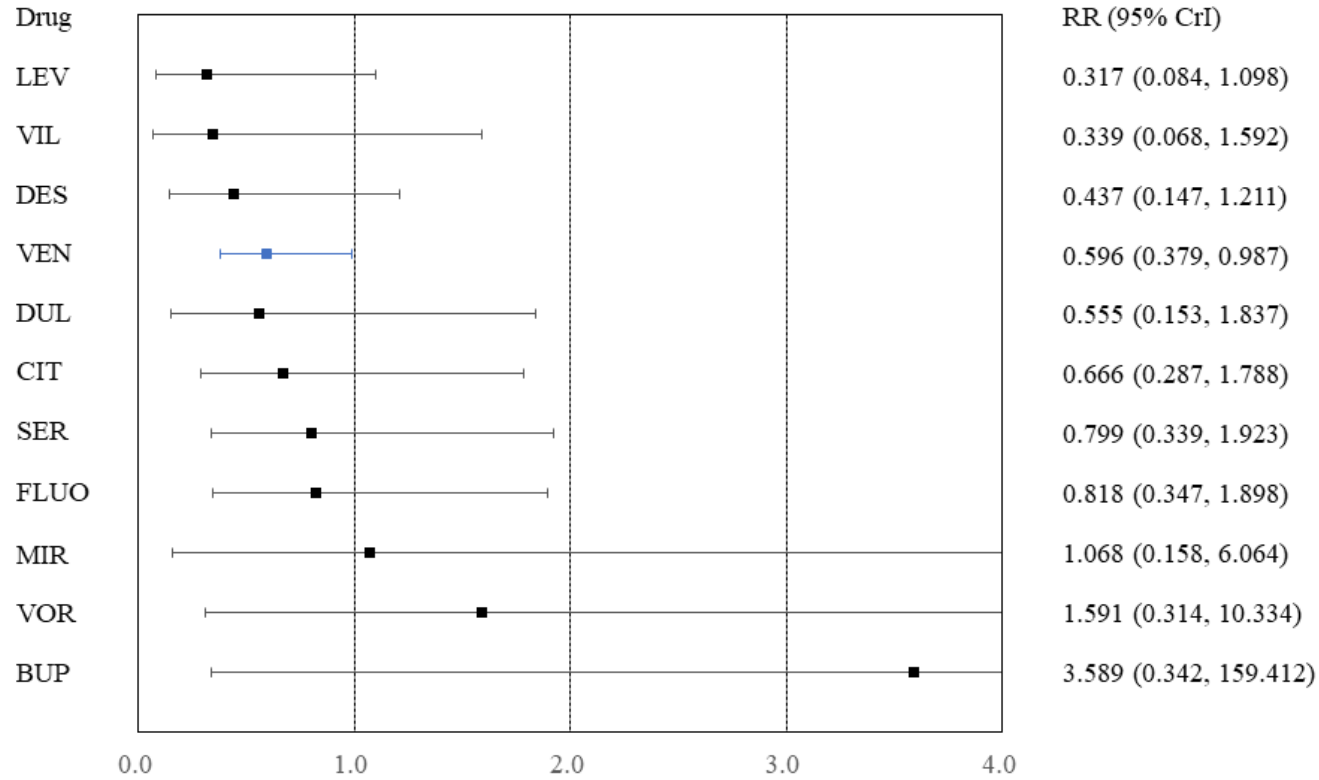

**Appendix S6. Headache (K = 23, n = 6934).**

**League table (risk ratio with 95% credible interval)**

|                      |                      |                      |                      |                      |                      |                      |                      |                       |                      |                      |     |  |  |  |  |  |
|----------------------|----------------------|----------------------|----------------------|----------------------|----------------------|----------------------|----------------------|-----------------------|----------------------|----------------------|-----|--|--|--|--|--|
| PLA                  |                      |                      |                      |                      |                      |                      |                      |                       |                      |                      |     |  |  |  |  |  |
| 1.247 (0.481, 3.149) | AGO                  |                      |                      |                      |                      |                      |                      |                       |                      |                      |     |  |  |  |  |  |
| 0.792 (0.324, 1.876) | 0.631 (0.173, 2.403) | BUP                  |                      |                      |                      |                      |                      |                       |                      |                      |     |  |  |  |  |  |
| 1.153 (0.642, 2.104) | 0.924 (0.301, 2.899) | 1.456 (0.522, 4.350) | CIT                  |                      |                      |                      |                      |                       |                      |                      |     |  |  |  |  |  |
| 1.207 (0.745, 2.052) | 0.969 (0.335, 2.939) | 1.537 (0.565, 4.426) | 1.051 (0.485, 2.306) | DES                  |                      |                      |                      |                       |                      |                      |     |  |  |  |  |  |
| 1.175 (0.617, 2.244) | 0.935 (0.302, 3.028) | 1.492 (0.497, 4.556) | 1.018 (0.422, 2.466) | 0.972 (0.415, 2.172) | DUL                  |                      |                      |                       |                      |                      |     |  |  |  |  |  |
| 1.060 (0.425, 2.922) | 0.842 (0.222, 3.442) | 1.362 (0.388, 5.010) | 0.928 (0.302, 2.934) | 0.888 (0.299, 2.626) | 0.905 (0.295, 2.972) | ESC                  |                      |                       |                      |                      |     |  |  |  |  |  |
| 0.963 (0.554, 1.685) | 0.764 (0.262, 2.360) | 1.223 (0.442, 3.442) | 0.841 (0.370, 1.863) | 0.800 (0.365, 1.652) | 0.821 (0.348, 1.984) | 0.907 (0.287, 2.633) | FLUO                 |                       |                      |                      |     |  |  |  |  |  |
| 0.408 (0.118, 1.276) | 0.327 (0.069, 1.384) | 0.519 (0.112, 2.189) | 0.350 (0.091, 1.270) | 0.337 (0.089, 1.157) | 0.345 (0.086, 1.262) | 0.379 (0.079, 1.687) | 0.423 (0.114, 1.520) | FLUV                  |                      |                      |     |  |  |  |  |  |
| 1.380 (0.776, 2.596) | 1.113 (0.382, 3.341) | 1.756 (0.624, 5.135) | 1.194 (0.524, 2.853) | 1.149 (0.527, 2.457) | 1.178 (0.495, 2.921) | 1.287 (0.414, 4.108) | 1.424 (0.650, 3.220) | 3.338 (0.955, 13.581) | LEV                  |                      |     |  |  |  |  |  |
| 0.791 (0.319, 2.042) | 0.638 (0.170, 2.422) | 1.005 (0.289, 3.586) | 0.689 (0.231, 2.081) | 0.658 (0.228, 1.898) | 0.671 (0.219, 2.136) | 0.739 (0.196, 2.698) | 0.823 (0.284, 2.366) | 1.907 (0.447, 9.330)  | 0.574 (0.191, 1.722) | MIR                  |     |  |  |  |  |  |
| 1.489 (0.598, 3.858) | 1.173 (0.319, 4.576) | 1.868 (0.518, 6.991) | 1.291 (0.435, 3.947) | 1.232 (0.414, 3.618) | 1.258 (0.408, 4.058) | 1.399 (0.355, 5.214) | 1.542 (0.535, 4.630) | 3.730 (0.814, 17.295) | 1.092 (0.341, 3.323) | 1.918 (0.489, 7.030) | NEF |  |  |  |  |  |

|                         |                         |                         |                         |                         |                         |                         |                         |                                  |                         |                         |                         |                          |                         |                         |                         |     |
|-------------------------|-------------------------|-------------------------|-------------------------|-------------------------|-------------------------|-------------------------|-------------------------|----------------------------------|-------------------------|-------------------------|-------------------------|--------------------------|-------------------------|-------------------------|-------------------------|-----|
| 0.954 (0.205,<br>4.726) | 0.785 (0.121,<br>4.932) | 1.248 (0.214,<br>7.518) | 0.830 (0.159,<br>4.710) | 0.801 (0.160,<br>4.025) | 0.811 (0.151,<br>4.708) | 0.905 (0.145,<br>6.122) | 0.992 (0.199,<br>5.386) | 2.377 (0.351,<br>18.664)         | 0.697 (0.131,<br>3.686) | 1.223 (0.209,<br>7.336) | 0.654 (0.108,<br>3.906) | REB                      |                         |                         |                         |     |
| 0.862 (0.487,<br>1.511) | 0.690 (0.228,<br>2.070) | 1.090 (0.392,<br>3.235) | 0.751 (0.332,<br>1.680) | 0.716 (0.327,<br>1.485) | 0.736 (0.310,<br>1.715) | 0.816 (0.259,<br>2.376) | 0.899 (0.413,<br>1.952) | 2.093 (0.588,<br>8.130)          | 0.625 (0.274,<br>1.431) | 1.090 (0.369,<br>3.166) | 0.581 (0.189,<br>1.698) | 0.895 (0.164,<br>4.538)  | SER                     |                         |                         |     |
| 1.160 (0.716,<br>1.892) | 0.924 (0.322,<br>2.744) | 1.468 (0.551,<br>4.052) | 1.014 (0.459,<br>2.161) | 0.968 (0.467,<br>1.861) | 0.985 (0.435,<br>2.224) | 1.092 (0.353,<br>3.084) | 1.204 (0.582,<br>2.515) | 2.838 (0.819,<br>10.913)         | 0.841 (0.379,<br>1.769) | 1.466 (0.512,<br>4.138) | 0.777 (0.264,<br>2.215) | 1.211 (0.221,<br>6.027)  | 1.345 (0.651,<br>2.784) | VEN                     |                         |     |
| 1.951 (0.874,<br>5.137) | 1.556 (0.449,<br>6.098) | 2.524 (0.726,<br>9.298) | 1.709 (0.612,<br>5.219) | 1.635 (0.604,<br>4.637) | 1.670 (0.584,<br>5.344) | 1.859 (0.501,<br>7.005) | 2.032 (0.734,<br>6.110) | <b>4.873 (1.196,<br/>22.351)</b> | 1.422 (0.499,<br>4.271) | 2.487 (0.703,<br>9.106) | 1.317 (0.378,<br>5.072) | 2.021 (0.325,<br>12.649) | 2.271 (0.831,<br>6.903) | 1.698 (0.653,<br>4.895) | VIL                     |     |
| 0.934 (0.461,<br>1.898) | 0.753 (0.228,<br>2.459) | 1.175 (0.413,<br>3.712) | 0.803 (0.325,<br>2.026) | 0.777 (0.315,<br>1.792) | 0.791 (0.306,<br>2.103) | 0.880 (0.257,<br>2.797) | 0.972 (0.393,<br>2.430) | 2.310 (0.587,<br>9.146)          | 0.673 (0.265,<br>1.741) | 1.179 (0.373,<br>3.896) | 0.632 (0.186,<br>2.090) | 0.977 (0.171,<br>5.499)  | 1.079 (0.442,<br>2.712) | 0.807 (0.343,<br>1.943) | 0.478 (0.151,<br>1.391) | VOR |

## Evaluation of heterogeneity

### Network meta-analysis

Between study variance ( $\tau^2$ ): 0.0256

Heterogeneity assessment: Moderate

### Pairwise meta-analysis

|             | Risk ratio (95% confidence interval) | I <sup>2</sup> |
|-------------|--------------------------------------|----------------|
| AGO vs PLA  | 1.246 (0.575, 2.703)                 | na             |
| BUP vs PLA  | 0.801 (0.395, 1.624)                 | na             |
| CIT vs PLA  | 1.133 (0.706, 1.819)                 | 0.0%           |
| DES vs PLA  | 1.176 (0.816, 1.694)                 | 48.5%          |
| DUL vs PLA  | 1.219 (0.800, 1.858)                 | 48.2%          |
| ESC vs PLA  | 1.028 (0.457, 2.312)                 | na             |
| FLUO vs PLA | 0.953 (0.616, 1.474)                 | 30.6%          |

|             |                      |      |
|-------------|----------------------|------|
| FLUV vs PLA | 0.431 (0.153, 1.217) | na   |
| LEV vs PLA  | 1.359 (0.843, 2.193) | 0.0% |
| MIR vs PLA  | 0.810 (0.378, 1.735) | na   |
| NEF vs PLA  | 1.467 (0.674, 3.192) | na   |
| REB vs PLA  | 0.972 (0.248, 3.813) | na   |
| SER vs PLA  | 0.872 (0.576, 1.321) | 0.0% |
| VEN vs PLA  | 1.152 (0.821, 1.617) | 0.0% |
| VIL vs PLA  | 1.898 (0.927, 3.883) | na   |
| VOR vs PLA  | 0.941 (0.561, 1.580) | na   |

**Forest plot (vs placebo, the numbers are risk ratios with 95% credible interval)**

Treatments are ranked according to their SCURA.

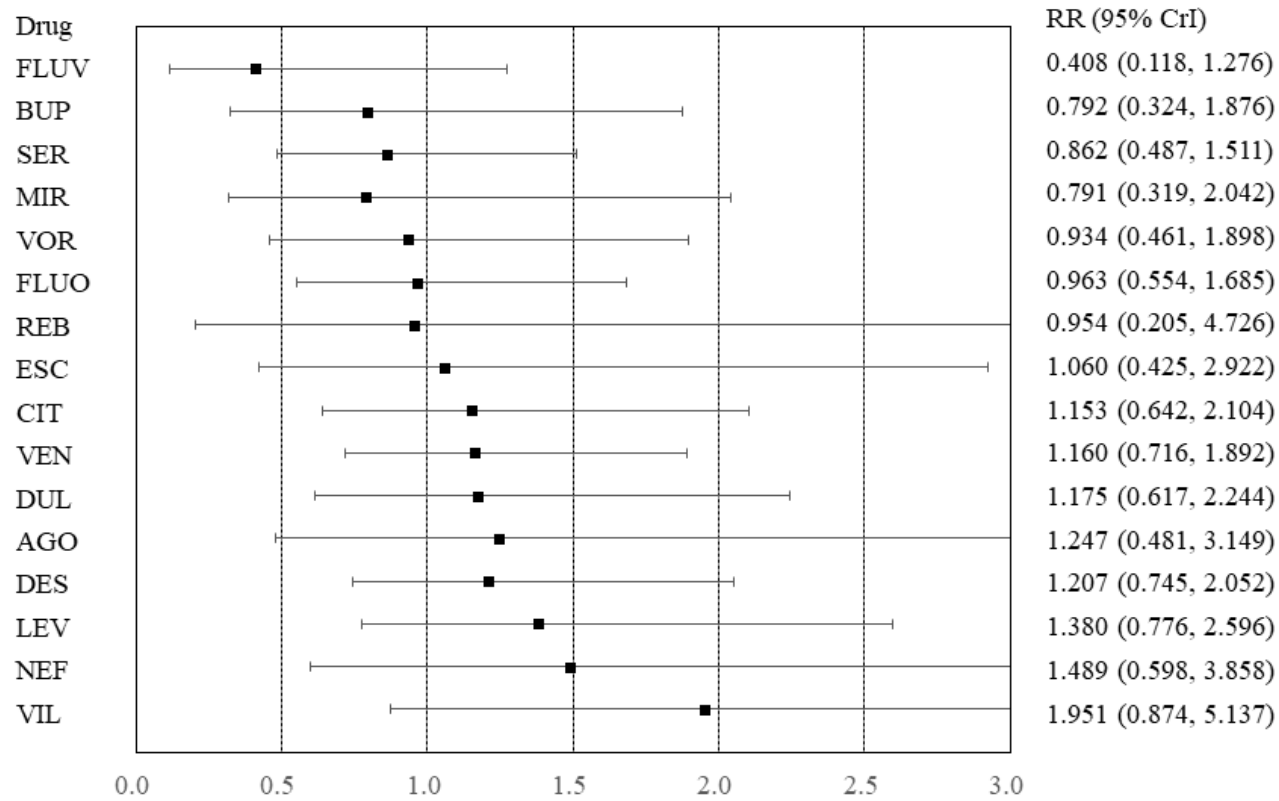



## **Appendix S7. Somnolence (K = 8, n = 2746).**

### **League table (risk ratio with 95% credible interval)**

|                       |                       |                       |                       |                      |                       |     |
|-----------------------|-----------------------|-----------------------|-----------------------|----------------------|-----------------------|-----|
| PLA                   |                       |                       |                       |                      |                       |     |
| 1.128 (0.454, 2.758)  | CIT                   |                       |                       |                      |                       |     |
| 1.178 (0.471, 3.149)  | 1.049 (0.287, 3.933)  | FLUO                  |                       |                      |                       |     |
| 0.857 (0.291, 2.530)  | 0.768 (0.189, 3.027)  | 0.717 (0.176, 3.018)  | MIR                   |                      |                       |     |
| 3.037 (0.368, 59.637) | 2.682 (0.276, 58.571) | 2.596 (0.247, 55.628) | 3.668 (0.340, 72.574) | SER                  |                       |     |
| 0.612 (0.158, 2.226)  | 0.545 (0.105, 2.638)  | 0.523 (0.095, 2.492)  | 0.730 (0.117, 3.955)  | 0.196 (0.008, 2.759) | VEN                   |     |
| 0.901 (0.195, 5.141)  | 0.787 (0.134, 5.591)  | 0.762 (0.124, 5.627)  | 1.040 (0.159, 7.829)  | 0.293 (0.011, 4.284) | 1.493 (0.192, 12.249) | VIL |

### **Evaluation of heterogeneity**

#### Network meta-analysis

Between study variance ( $\tau^2$ ): 0.073

Heterogeneity assessment: Moderate

#### Pairwise meta-analysis

|             | Risk ratio (95% confidence interval) | I <sup>2</sup> |
|-------------|--------------------------------------|----------------|
| CIT vs PLA  | 1.110 (0.534, 2.308)                 | 0.0%           |
| FLUO vs PLA | 1.159 (0.593, 2.265)                 | na             |
| MIR vs PLA  | 0.861 (0.378, 1.961)                 | na             |
| SER vs PLA  | 2.378 (0.269, 21.010)                | na             |
| VEN vs PLA  | 0.639 (0.215, 1.904)                 | na             |
| VIL vs PLA  | 0.863 (0.208, 3.571)                 | na             |

**Forest plot (vs placebo, the numbers are risk ratios with 95% credible interval)**

Treatments are ranked according to their SCURA.

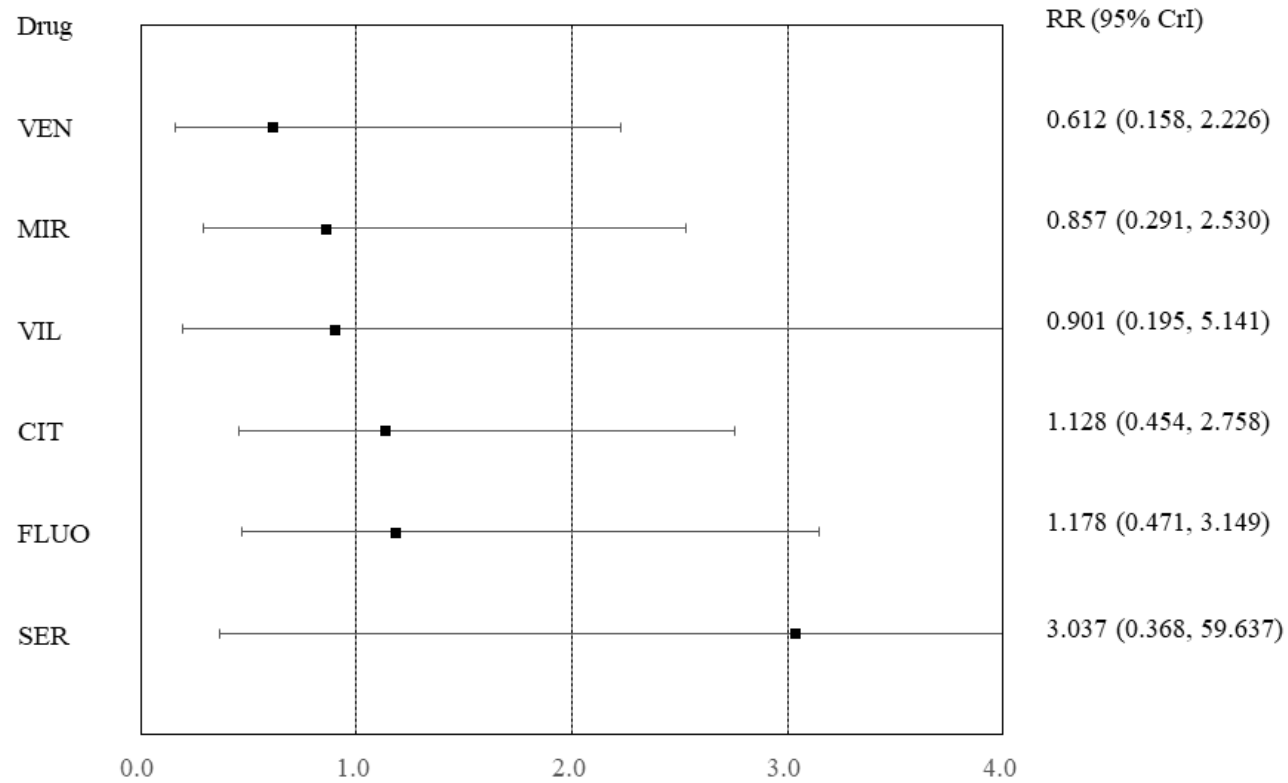

## Appendix S8. Insomnia (K = 19, n = 6219).

### League table (risk ratio with 95% credible interval)

|                       |                        |                       |                        |                        |                        |                       |                        |                        |                       |                        |                        |     |  |
|-----------------------|------------------------|-----------------------|------------------------|------------------------|------------------------|-----------------------|------------------------|------------------------|-----------------------|------------------------|------------------------|-----|--|
| PLA                   |                        |                       |                        |                        |                        |                       |                        |                        |                       |                        |                        |     |  |
| 1.006 (0.138, 7.381)  | BUP                    |                       |                        |                        |                        |                       |                        |                        |                       |                        |                        |     |  |
| 1.429 (0.658, 3.970)  | 1.462 (0.177, 13.550)  | CIT                   |                        |                        |                        |                       |                        |                        |                       |                        |                        |     |  |
| 1.150 (0.345, 3.947)  | 1.166 (0.112, 11.317)  | 0.807 (0.168, 3.312)  | DES                    |                        |                        |                       |                        |                        |                       |                        |                        |     |  |
| 0.427 (0.125, 1.405)  | 0.429 (0.044, 4.185)   | 0.295 (0.059, 1.159)  | 0.372 (0.064, 2.010)   | DUL                    |                        |                       |                        |                        |                       |                        |                        |     |  |
| 0.766 (0.198, 2.982)  | 0.764 (0.072, 7.824)   | 0.528 (0.096, 2.429)  | 0.663 (0.103, 4.205)   | 1.777 (0.299, 11.103)  | ESC                    |                       |                        |                        |                       |                        |                        |     |  |
| 1.539 (0.657, 3.871)  | 1.539 (0.188, 13.521)  | 1.081 (0.276, 3.463)  | 1.353 (0.287, 6.132)   | 3.617 (0.840, 17.357)  | 2.020 (0.427, 11.053)  | FLUO                  |                        |                        |                       |                        |                        |     |  |
| 0.980 (0.308, 3.321)  | 0.956 (0.099, 9.458)   | 0.663 (0.147, 2.793)  | 0.839 (0.158, 4.744)   | 2.310 (0.432, 12.866)  | 1.277 (0.217, 7.886)   | 0.627 (0.147, 2.635)  | LEV                    |                        |                       |                        |                        |     |  |
| 1.007 (0.221, 4.266)  | 0.979 (0.085, 11.143)  | 0.698 (0.113, 3.615)  | 0.872 (0.131, 5.787)   | 2.356 (0.357, 15.589)  | 1.309 (0.172, 9.102)   | 0.656 (0.111, 3.624)  | 1.037 (0.139, 6.516)   | REB                    |                       |                        |                        |     |  |
| 1.233 (0.474, 3.145)  | 1.238 (0.140, 11.179)  | 0.852 (0.197, 2.774)  | 1.086 (0.220, 4.718)   | 2.860 (0.627, 13.013)  | 1.627 (0.304, 8.563)   | 0.790 (0.202, 2.737)  | 1.272 (0.270, 5.552)   | 1.218 (0.218, 7.256)   | SER                   |                        |                        |     |  |
| 1.136 (0.335, 3.718)  | 1.098 (0.110, 10.959)  | 0.787 (0.154, 3.033)  | 0.981 (0.172, 5.308)   | 2.634 (0.478, 13.956)  | 1.471 (0.233, 9.003)   | 0.720 (0.160, 3.235)  | 1.159 (0.201, 6.048)   | 1.115 (0.164, 7.850)   | 0.905 (0.201, 4.154)  | VEN                    |                        |     |  |
| 0.568 (0.147, 2.475)  | 0.566 (0.056, 6.556)   | 0.391 (0.072, 1.984)  | 0.496 (0.077, 3.501)   | 1.333 (0.225, 9.166)   | 0.753 (0.106, 5.406)   | 0.366 (0.071, 1.997)  | 0.590 (0.083, 3.685)   | 0.569 (0.081, 4.312)   | 0.463 (0.092, 2.724)  | 0.515 (0.083, 3.502)   | VIL                    |     |  |
| 3.440 (0.322, 98.847) | 3.628 (0.168, 154.636) | 2.383 (0.189, 77.457) | 3.073 (0.203, 102.355) | 8.361 (0.569, 301.829) | 4.668 (0.302, 155.393) | 2.297 (0.177, 69.567) | 3.643 (0.258, 124.941) | 3.725 (0.220, 121.160) | 2.837 (0.229, 92.028) | 3.147 (0.227, 104.014) | 6.090 (0.371, 207.374) | VOR |  |

### Evaluation of heterogeneity

#### Network meta-analysis

Between study variance ( $\tau^2$ ): 0.122

Heterogeneity assessment: Moderate

#### Pairwise meta-analysis

|            | Risk ratio (95% confidence interval) | I <sup>2</sup> |
|------------|--------------------------------------|----------------|
| BUP vs PLA | 0.986 (0.189, 5.154)                 | na             |

|             |                       |       |
|-------------|-----------------------|-------|
| CIT vs PLA  | 1.320 (0.686, 2.541)  | 39.9% |
| DES vs PLA  | 1.151 (0.467, 2.837)  | na    |
| DUL vs PLA  | 0.438 (0.181, 1.056)  | na    |
| ESC vs PLA  | 0.734 (0.259, 2.076)  | na    |
| FLUO vs PLA | 1.518 (0.781, 2.952)  | 0.0%  |
| LEV vs PLA  | 0.877 (0.313, 2.460)  | 58.6% |
| REB vs PLA  | 0.972 (0.293, 3.225)  | na    |
| SER vs PLA  | 1.229 (0.613, 2.464)  | 0.0%  |
| VEN vs PLA  | 1.101 (0.471, 2.578)  | na    |
| VIL vs PLA  | 0.591 (0.197, 1.776)  | na    |
| VOR vs PLA  | 2.824 (0.283, 28.185) | na    |

**Forest plot (vs placebo, the numbers are risk ratios with 95% credible interval)**

Treatments are ranked according to their SCURA.

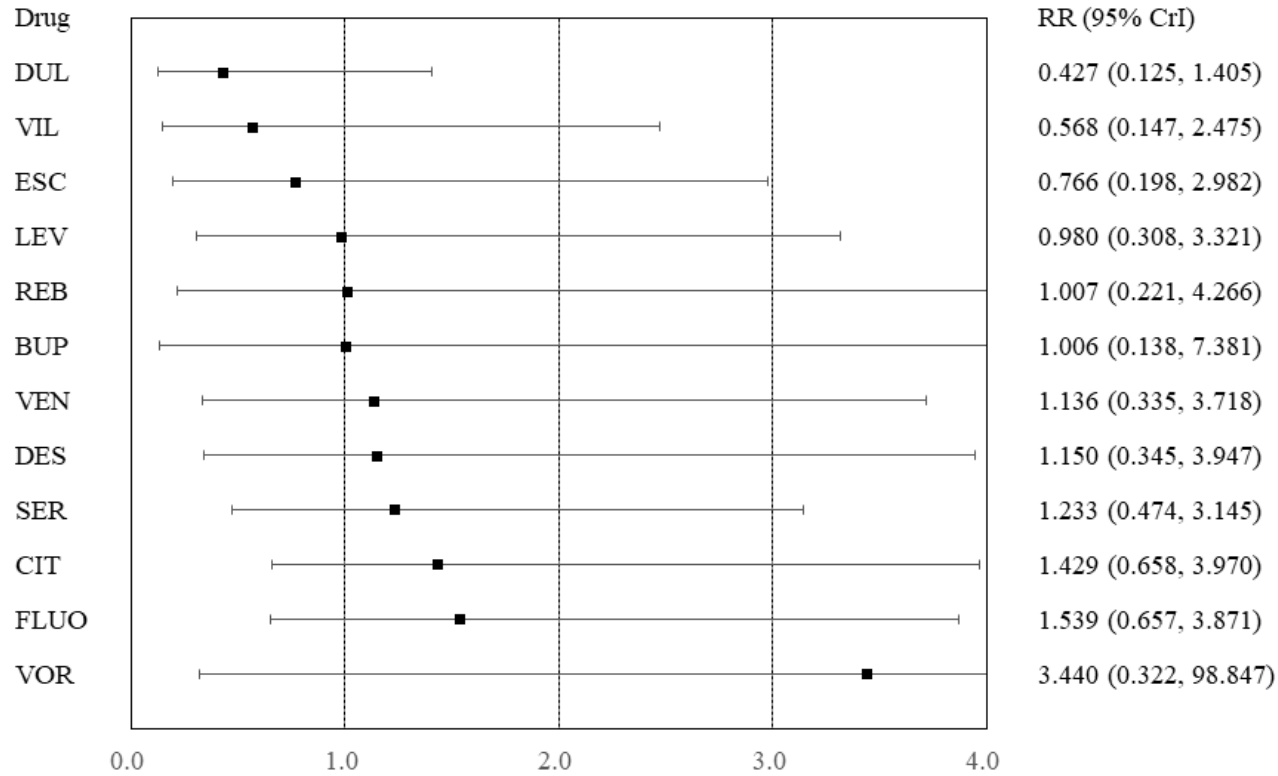

## Appendix S9. Dry mouth (K = 12, n = 3913).

### League table (risk ratio with 95% credible interval)

|                       |                       |                       |                      |                      |                      |     |
|-----------------------|-----------------------|-----------------------|----------------------|----------------------|----------------------|-----|
| PLA                   |                       |                       |                      |                      |                      |     |
| 1.651 (0.518, 6.591)  | CIT                   |                       |                      |                      |                      |     |
| 2.184 (0.743, 6.983)  | 1.317 (0.224, 7.012)  | DUL                   |                      |                      |                      |     |
| 1.854 (0.190, 54.937) | 1.119 (0.078, 43.020) | 0.852 (0.065, 30.310) | LEV                  |                      |                      |     |
| 0.856 (0.261, 2.682)  | 0.510 (0.087, 2.672)  | 0.387 (0.070, 1.925)  | 0.453 (0.012, 5.847) | MIR                  |                      |     |
| 1.438 (0.619, 3.516)  | 0.860 (0.167, 3.882)  | 0.657 (0.157, 2.651)  | 0.774 (0.023, 9.349) | 1.705 (0.395, 7.554) | SER                  |     |
| 0.750 (0.241, 2.304)  | 0.440 (0.079, 2.450)  | 0.337 (0.070, 1.599)  | 0.403 (0.010, 4.989) | 0.877 (0.184, 4.402) | 0.523 (0.124, 2.108) | VEN |

### Evaluation of heterogeneity

#### Network meta-analysis

Between study variance ( $\tau^2$ ): 0.104

Heterogeneity assessment: Moderate

#### Pairwise meta-analysis

|            | Risk ratio (95% confidence interval) | I <sup>2</sup> |
|------------|--------------------------------------|----------------|
| CIT vs PLA | 1.600 (0.643, 3.984)                 | na             |
| DUL vs PLA | <b>2.161 (1.019, 4.585)</b>          | na             |
| LEV vs PLA | 1.442 (0.152, 13.708)                | na             |
| MIR vs PLA | 0.861 (0.378, 1.961)                 | na             |
| SER vs PLA | 1.420 (0.738, 2.734)                 | 0.0%           |
| VEN vs PLA | 0.750 (0.358, 1.572)                 | na             |

**Forest plot (vs placebo, the numbers are risk ratios with 95% credible interval)**

Treatments are ranked according to their SCURA.

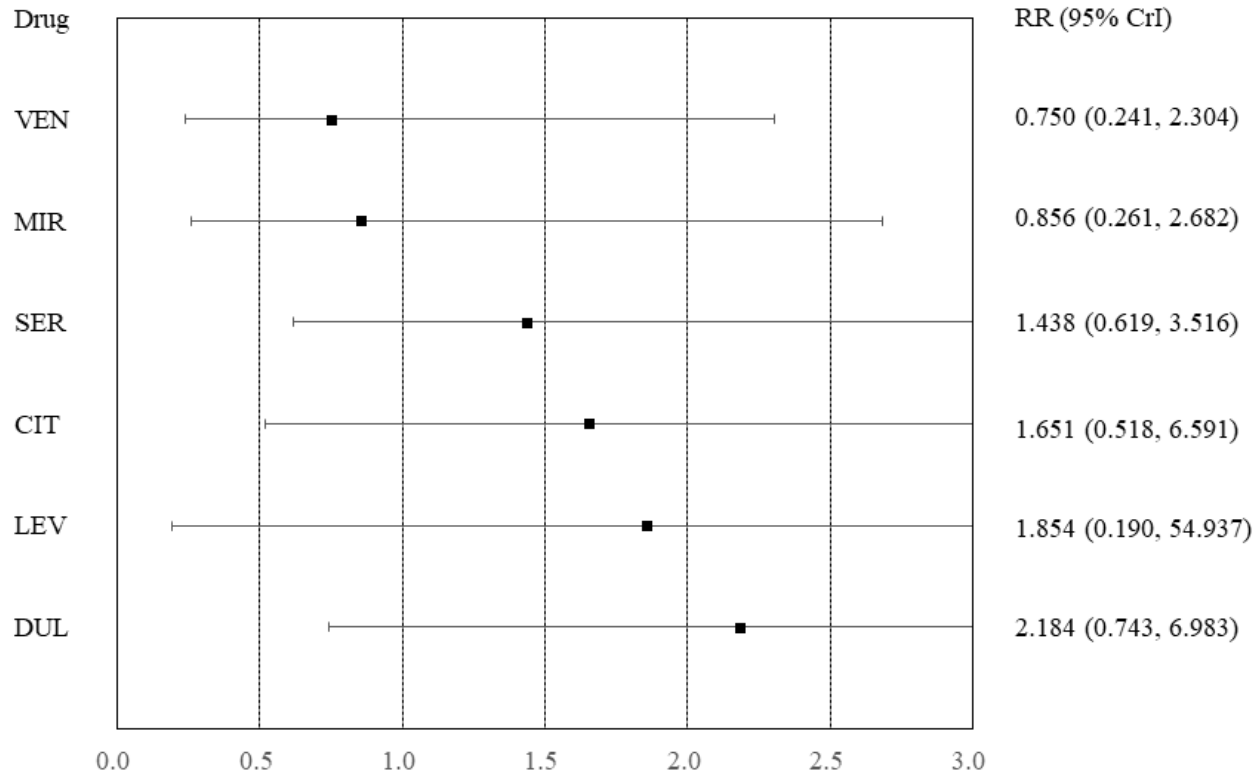

## **Appendix S10. Constipation (K = 12, n = 3806).**

### **League table (risk ratio with 95% credible interval)**

|                       |                        |                      |                       |                       |                       |                        |     |
|-----------------------|------------------------|----------------------|-----------------------|-----------------------|-----------------------|------------------------|-----|
| PLA                   |                        |                      |                       |                       |                       |                        |     |
| 0.995 (0.018, 62.910) | BUP                    |                      |                       |                       |                       |                        |     |
| 3.059 (0.458, 22.620) | 3.163 (0.032, 277.492) | CIT                  |                       |                       |                       |                        |     |
| 0.716 (0.104, 4.836)  | 0.727 (0.008, 57.017)  | 0.229 (0.014, 3.425) | DUL                   |                       |                       |                        |     |
| 0.393 (0.077, 1.978)  | 0.395 (0.004, 28.523)  | 0.130 (0.010, 1.726) | 0.544 (0.046, 6.936)  | LEV                   |                       |                        |     |
| 1.484 (0.224, 10.708) | 1.503 (0.015, 114.551) | 0.488 (0.030, 7.537) | 2.054 (0.140, 34.082) | 3.786 (0.314, 47.691) | REB                   |                        |     |
| 0.258 (0.007, 5.199)  | 0.243 (0.001, 35.970)  | 0.082 (0.001, 3.127) | 0.350 (0.006, 14.257) | 0.636 (0.012, 21.469) | 0.171 (0.003, 6.213)  | SER                    |     |
| 2.086 (0.532, 8.683)  | 2.058 (0.025, 146.948) | 0.681 (0.058, 7.284) | 2.883 (0.281, 32.902) | 5.318 (0.589, 44.948) | 1.406 (0.125, 15.395) | 8.149 (0.286, 375.747) | VEN |

### **Evaluation of heterogeneity**

#### Network meta-analysis

Between study variance ( $\tau^2$ ): 0.390

Heterogeneity assessment: High

#### Pairwise meta-analysis

|            | Risk ratio (95% confidence interval) | I <sup>2</sup> |
|------------|--------------------------------------|----------------|
| BUP vs PLA | 0.986 (0.062, 15.660)                | na             |
| CIT vs PLA | <b>3.147 (1.201, 8.247)</b>          | 0.0%           |
| DUL vs PLA | 0.729 (0.260, 2.049)                 | na             |
| LEV vs PLA | 0.439 (0.141, 1.365)                 | 48.4%          |
| REB vs PLA | 1.459 (0.533, 3.991)                 | na             |
| SER vs PLA | 0.297 (0.027, 3.241)                 | na             |
| VEN vs PLA | 1.966 (0.930, 4.158)                 | 0.0%           |



**Forest plot (vs placebo, the numbers are risk ratios with 95% credible interval)**

Treatments are ranked according to their SCURA.

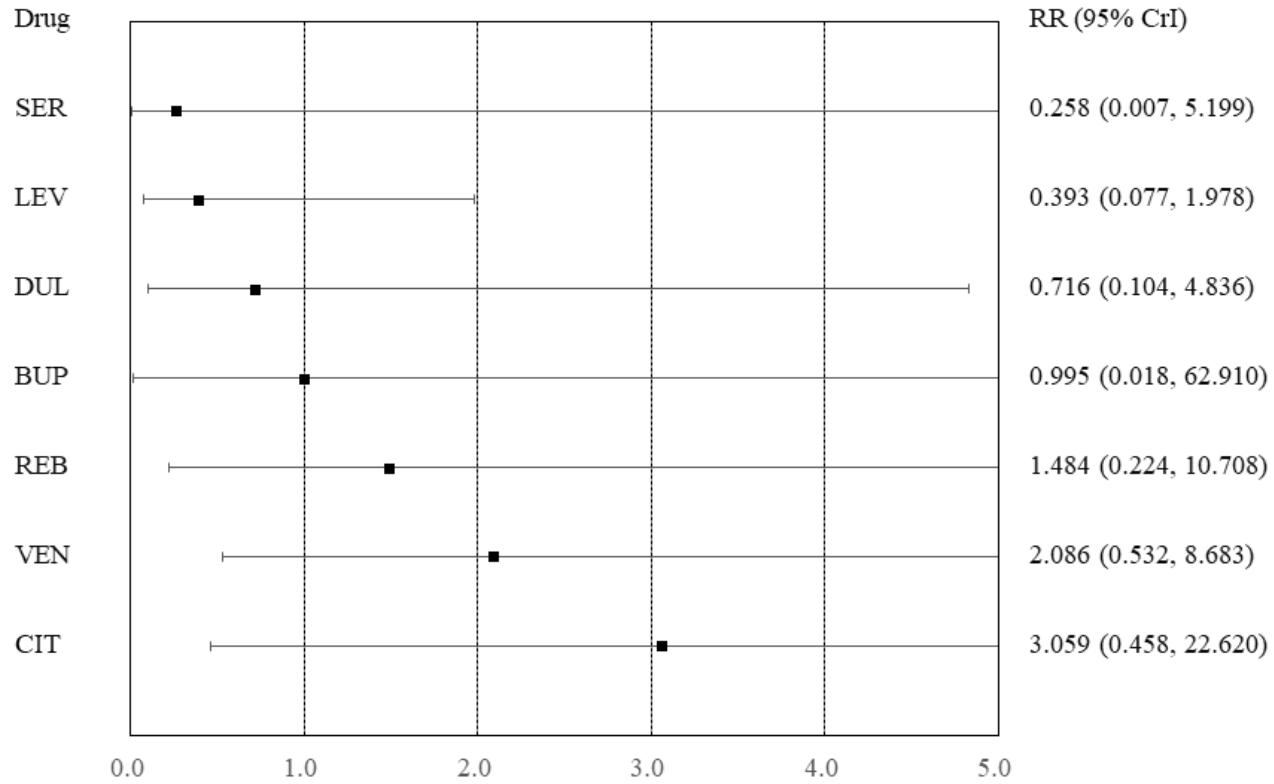

## **Appendix S11. Sweating (K = 7, n = 1831).**

### **League table (risk ratio with 95% credible interval)**

|                       |                       |                       |                      |     |
|-----------------------|-----------------------|-----------------------|----------------------|-----|
| PLA                   |                       |                       |                      |     |
| 0.524 (0.159, 1.570)  | CIT                   |                       |                      |     |
| 1.088 (0.204, 6.769)  | 2.106 (0.287, 17.964) | LEV                   |                      |     |
| 2.289 (0.517, 10.659) | 4.398 (0.702, 30.351) | 2.146 (0.188, 19.924) | SER                  |     |
| 1.568 (0.568, 4.210)  | 2.996 (0.690, 13.734) | 1.423 (0.180, 10.028) | 0.685 (0.111, 4.103) | VEN |

### **Evaluation of heterogeneity**

#### Network meta-analysis

Between study variance ( $\tau^2$ ): 0.171

Heterogeneity assessment: Moderate

#### Pairwise meta-analysis

|            | Risk ratio (95% confidence interval) | I <sup>2</sup> |
|------------|--------------------------------------|----------------|
| CIT vs PLA | 0.557 (0.265, 1.168)                 | 0.0%           |
| LEV vs PLA | 1.026 (0.205, 5.136)                 | 0.0%           |
| SER vs PLA | 2.182 (0.861, 5.530)                 | na             |
| VEN vs PLA | 1.529 (0.888, 2.634)                 | 0.0%           |

**Forest plot (vs placebo, the numbers are risk ratios with 95% credible interval)**

Treatments are ranked according to their SCURA.

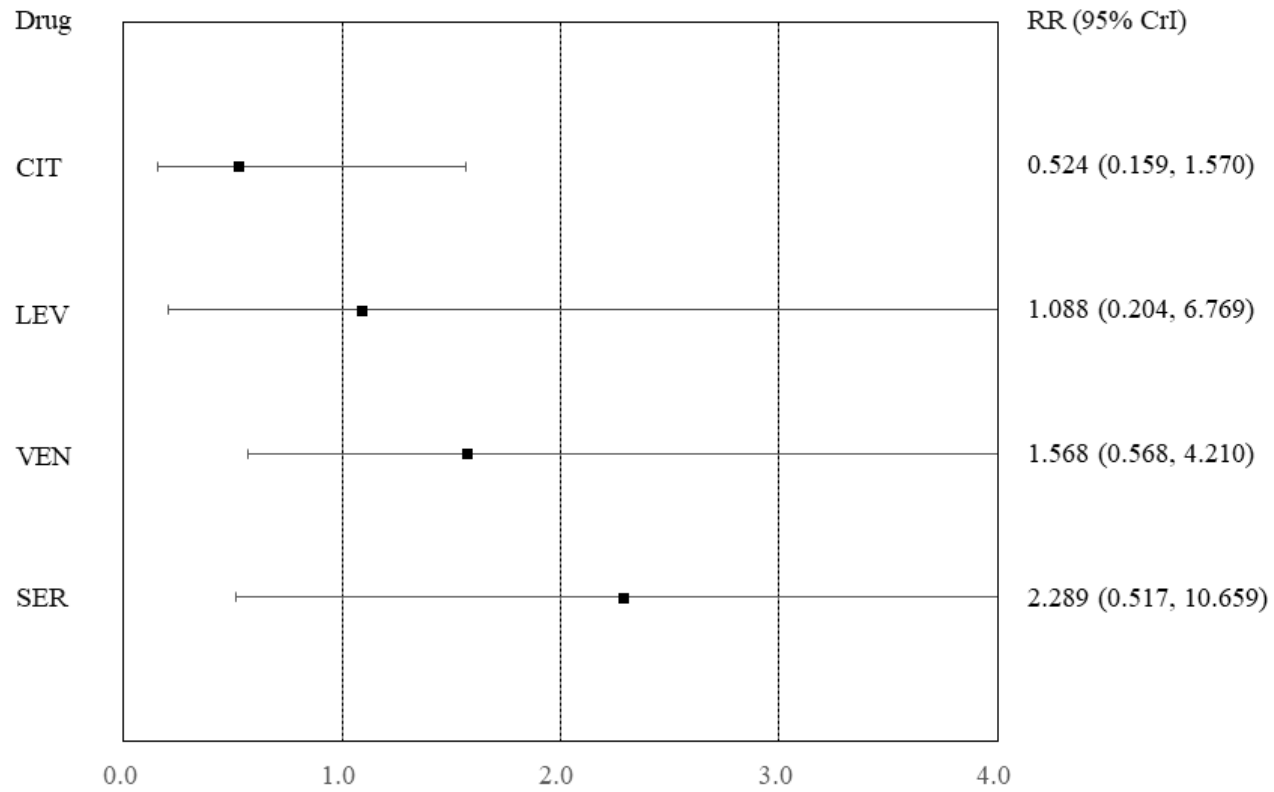

## **Appendix S12. Weight gain (K = 6, n = 2015).**

### **League table (risk ratio with 95% credible interval)**

|                       |                       |                       |                      |                       |                      |     |
|-----------------------|-----------------------|-----------------------|----------------------|-----------------------|----------------------|-----|
| PLA                   |                       |                       |                      |                       |                      |     |
| 2.417 (0.526, 13.022) | DUL                   |                       |                      |                       |                      |     |
| 1.094 (0.393, 2.928)  | 0.453 (0.062, 2.668)  | MIR                   |                      |                       |                      |     |
| 2.215 (0.656, 8.762)  | 0.922 (0.110, 7.048)  | 2.029 (0.429, 10.525) | SER                  |                       |                      |     |
| 1.802 (0.514, 6.391)  | 0.737 (0.089, 5.401)  | 1.633 (0.328, 8.398)  | 0.806 (0.132, 4.788) | VEN                   |                      |     |
| 2.312 (0.628, 10.960) | 0.955 (0.111, 8.980)  | 2.149 (0.413, 13.347) | 1.061 (0.150, 7.587) | 1.304 (0.206, 9.580)  | VIL                  |     |
| 2.509 (0.652, 14.244) | 1.033 (0.119, 10.507) | 2.308 (0.420, 16.401) | 1.138 (0.169, 8.878) | 1.431 (0.222, 11.366) | 1.081 (0.137, 8.798) | VOR |

### **Evaluation of heterogeneity**

#### Network meta-analysis

Between study variance ( $\tau^2$ ): 0.137

Heterogeneity assessment: Moderate

#### Pairwise meta-analysis

|            | Risk ratio (95% confidence interval) | I <sup>2</sup> |
|------------|--------------------------------------|----------------|
| DUL vs PLA | 2.269 (0.599, 8.603)                 | na             |
| MIR vs PLA | 1.096 (0.690, 1.744)                 | na             |
| SER vs PLA | 2.182 (0.861, 5.530)                 | na             |
| VEN vs PLA | 1.753 (0.712, 4.315)                 | na             |
| VIL vs PLA | 2.199 (0.751, 6.446)                 | na             |
| VOR vs PLA | 2.346 (0.707, 7.785)                 | na             |

**Forest plot (vs placebo, the numbers are risk ratios with 95% credible interval)**

Treatments are ranked according to their SCURA.

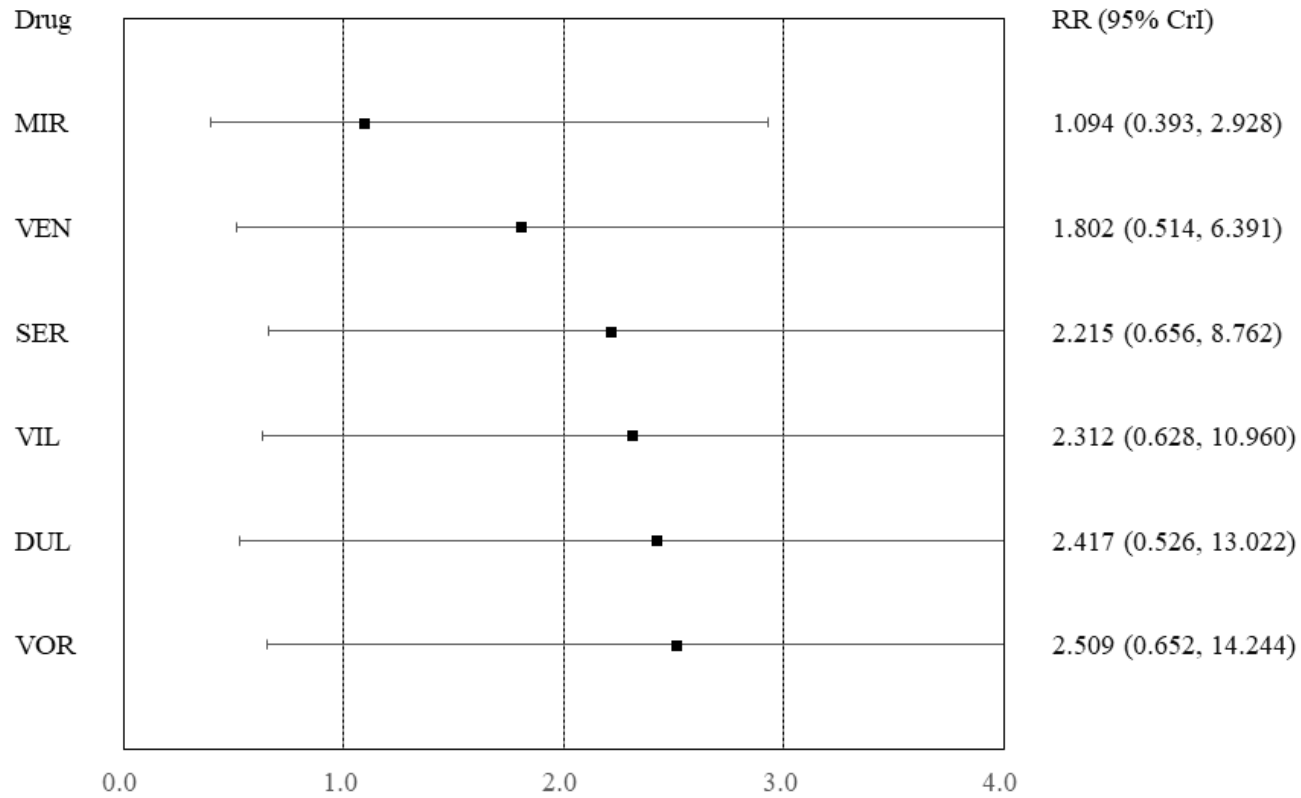

### **Appendix S13. Sexual dysfunction (K = 6, n = 1519).**

#### **League table (risk ratio with 95% credible interval)**

|                        |                        |                        |                         |                      |     |
|------------------------|------------------------|------------------------|-------------------------|----------------------|-----|
| PLA                    |                        |                        |                         |                      |     |
| 0.974 (0.078, 12.783)  | DUL                    |                        |                         |                      |     |
| 0.916 (0.101, 8.808)   | 0.926 (0.031, 31.090)  | FLUO                   |                         |                      |     |
| 0.779 (0.053, 12.945)  | 0.806 (0.020, 31.149)  | 0.860 (0.026, 28.597)  | LEV                     |                      |     |
| 8.519 (0.805, 126.908) | 8.962 (0.257, 356.349) | 9.792 (0.357, 298.325) | 11.283 (0.295, 536.570) | SER                  |     |
| 1.606 (0.325, 11.337)  | 1.676 (0.083, 39.013)  | 1.786 (0.120, 35.051)  | 2.077 (0.080, 56.885)   | 0.187 (0.007, 4.525) | VEN |

#### **Evaluation of heterogeneity**

##### Network meta-analysis

Between study variance ( $\tau^2$ ): 0.546

Heterogeneity assessment: High

##### Pairwise meta-analysis

|             | Risk ratio (95% confidence interval) | I <sup>2</sup> |
|-------------|--------------------------------------|----------------|
| DUL vs PLA  | 0.973 (0.200, 4.739)                 | na             |
| FLUO vs PLA | 0.900 (0.390, 2.079)                 | na             |
| LEV vs PLA  | 0.721 (0.122, 4.254)                 | na             |
| SER vs PLA  | <b>7.091 (1.653, 30.417)</b>         | na             |
| VEN vs PLA  | 1.432 (0.622, 3.299)                 | 0.0%           |

**Forest plot (vs placebo, the numbers are risk ratios with 95% credible interval)**

Treatments are ranked according to their SCURA.

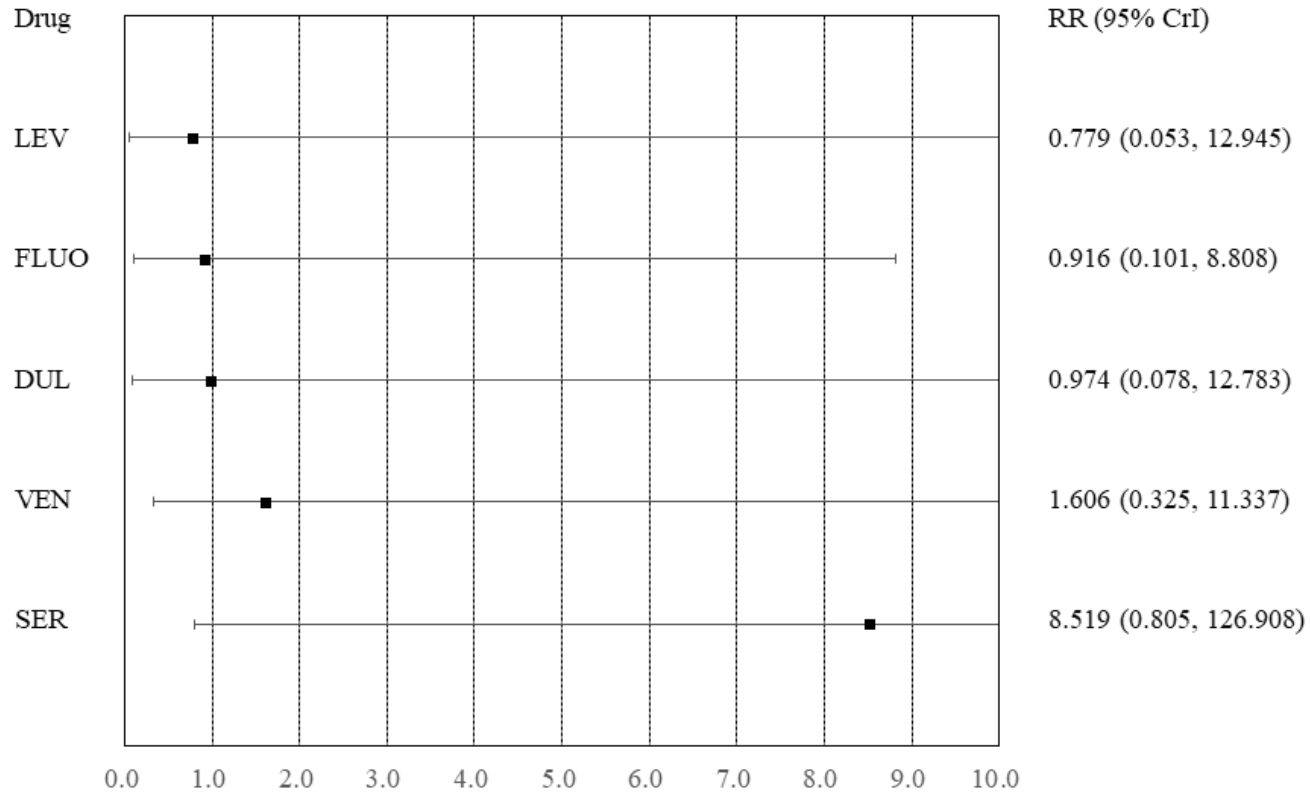

Supplement: 41380_2022_1824_MOESM1_ESM.pdf [file 41380_2022_1824_MOESM1_ESM.pdf]
